## **1 In-depth characterization of the Syrian hamster as translational model for 2 COVID-19 in humans**

3  
4 Martina Castellan<sup>1,2†</sup>, Gianpiero Zamperin<sup>1,3†</sup>, Giulia Franzoni<sup>4</sup>, Greta Foiani<sup>5</sup>,  
5 Maira Zorzan<sup>1,2</sup>, Petra Drzewnioková<sup>1,2</sup>, Marzia Mancin<sup>6</sup>, Irene Brian<sup>1,7</sup>, Alessio  
6 Bortolami<sup>1,8</sup>, Matteo Pagliari<sup>1,8</sup>, Annalisa Oggiano<sup>4</sup>, Marta Vascellari<sup>5</sup>,  
7 Valentina Panzarin<sup>1,7</sup>, Sergio Crovella<sup>9</sup>, Isabella Monne<sup>1,3</sup>, Calogero Terregino<sup>1</sup>,  
8 Paola De Benedictis<sup>1,2</sup> and Stefania Leopardi<sup>1,2\*</sup>

9  
10 <sup>1</sup> Division of Comparative Biomedical Sciences, Istituto Zooprofilattico Sperimentale delle Venezie,  
11 Legnaro, Italy

12 <sup>2</sup> Laboratory for Emerging Viral Zoonosis, Istituto Zooprofilattico Sperimentale delle Venezie, Legnaro,  
13 Italy

14 <sup>3</sup> Laboratory for Viral Genomics and Transcriptomics, Istituto Zooprofilattico Sperimentale delle Venezie,  
15 Legnaro, Italy

16 <sup>4</sup> Laboratory of Diagnostic Virology, Istituto Zooprofilattico Sperimentale della Sardegna

17 <sup>5</sup> Laboratory of Histopathology, Istituto Zooprofilattico Sperimentale delle Venezie, Legnaro, Italy

18 <sup>6</sup> Risk Analysis and Public Health Department, Istituto Zooprofilattico Sperimentale delle Venezie,  
19 Legnaro, Italy

20 <sup>7</sup> Innovative Virology Laboratory, Istituto Zooprofilattico Sperimentale delle Venezie, Legnaro, Italy

21 <sup>8</sup> Laboratory of Experimental Animal Models, Istituto Zooprofilattico Sperimentale delle Venezie,  
22 Legnaro, Italy

23 <sup>9</sup> Biological Science Program, Department of Biological and Environmental Sciences, College of Arts and  
24 Sciences, Qatar University, Doha

25 † These authors contributed equally to this work

26 \* Correspondence and requests for materials should be addressed to S.L. ([sleopardi@izsvenezie.it](mailto:sleopardi@izsvenezie.it))

27  
28  
29 **The recent emergence of severe acute respiratory syndrome coronavirus 2 (SARS-CoV-  
30 2) has highlighted the importance of having proper tools and models to study the  
31 pathophysiology of emerging infectious diseases to test therapeutic protocols, assess  
32 changes in viral phenotype and evaluate the effect of viral evolution. This study  
33 provides a comprehensive characterization of the Syrian hamster (*Mesocricetus auratus*)  
34 as an animal model for SARS-CoV-2 infection, using different approaches (description  
35 of clinical signs, viral replication, receptor profiling and host immune response) and  
36 targeting four different organs (lungs, intestine, brain and PBMCs). Our data showed  
37 that both male and female hamsters are susceptible to the infection and develop a  
38 disease similar to the one observed in patients with COVID-19, including moderate to  
39 severe pulmonary lesions, inflammation and recruitment of the immune system in lungs  
40 and at systemic level. However, all animals recovered within 14 days without developing  
41 the severe pathology seen in humans, and none of them died. We found faint evidence  
42 for intestinal and neurological tropism associated with absence of lesions and a minimal  
43 host response in intestines and brains, highlighting another crucial difference with the  
44 multi-organ impairment of severe COVID-19. When comparing male and female  
45 hamsters, it was observed that males sustained higher viral shedding and replication in  
46 lungs, suffered from more severe symptoms and histopathological lesions and triggered  
47 higher pulmonary inflammation. Overall, these data confirm the Syrian hamster as  
48 being a suitable model for mild-moderate COVID-19 and reflect sex-related differences  
49 in the response against the virus observed in humans.**

## 51 Introduction

52 The pandemic of coronavirus disease 2019 (COVID-19) has resulted in a devastating global  
53 threat to human society, economy and healthcare system<sup>1-3</sup>. The disease is caused by severe  
54 acute respiratory syndrome coronavirus 2 (SARS-CoV-2), a positive-sense single-stranded  
55 RNA virus belonging to the subgenus *Sarbecovirus*, genus *Betacoronavirus*, species *SARS-*  
56 *related coronavirus*, likely emerged from animals after zoonotic cross-species  
57 transmission<sup>4,5</sup>. The virus mostly replicates in the respiratory tract, but patients may also  
58 experience disorders associated to multi-organ engagement, including neurologic and gastro  
59 enteric symptoms, whose incidence, mechanism and significance is still a matter of  
60 discussion<sup>6-10</sup>. According to the age of the patient and the presence of predisposing factors,  
61 COVID-19 varies widely in the severity of its clinical manifestations, spanning from  
62 asymptomatic infections to an acute respiratory distress syndrome (ARDS) requiring  
63 mechanical ventilation and, in the worst-case scenario, to death<sup>11-13</sup>. Epidemiological data  
64 indicate that males are more prone to develop a severe COVID-19 symptomatology<sup>14-16</sup>,  
65 suggesting that sex may also influence SARS-CoV-2 pathogenesis due to genetic and  
66 hormonal factors, although social-behavioral differences between genders may also play a  
67 role<sup>14</sup>. Regardless of the cause, the development of severe disease follows a common  
68 mechanism in the dysregulation of the inflammatory response, similarly to what has been  
69 observed with other coronavirus infections, such as Severe Acute Respiratory Syndrome  
70 (SARS) and Middle East Respiratory Syndrome (MERS)<sup>11</sup>. Briefly, in the attempt to clear the  
71 infection, the immune system of certain individuals releases an excessive amount of pro-  
72 inflammatory cytokines, known as “cytokine storm”, promoting an uncontrolled  
73 inflammation that damages lungs and other organs, such as brain, gut and heart<sup>17,18</sup>. This  
74 important evidence has paved the way for a diagnostic, prognostic and therapeutic approach  
75 focused on controlling patients’ immune response, with particular attention to the innate  
76 immunity<sup>19,20</sup>. The overarching goal is to control the pandemic by reducing the incidence of  
77 severe manifestations through vaccination campaigns, and to develop and assess the efficacy  
78 of therapeutic agents against the new variants deriving from the evolution of SARS-CoV-2.  
79 Among them, the WHO classifies as “variants of concern (VOCs)” viruses<sup>21</sup> that show  
80 mutations on the spike protein that might influence transmissibility, symptomatology,  
81 immune-protection, efficacy of therapeutic monoclonal antibodies and sensitivity of  
82 diagnostic methods<sup>22-29</sup>. In this race, researchers need reliable animal models that i) are  
83 susceptible to the infection, ii) are able to eliminate the virus, iii) display clinical and  
84 pathological manifestations typical of human disease, and iv) mimic the same immune  
85 disorder found in patients. Non-human primates, ferrets, hamsters, and transgenic mice (i.e.  
86 K18-hACE2 mouse) are permissive to SARS-CoV-2 infection and develop lung lesions  
87 resembling pathological patterns found in humans<sup>30-34</sup>. Among these, the Syrian hamster  
88 (*Mesocricetus auratus*) exhibits the best balance between costs, neurological development,  
89 easy handling and maintenance in captivity and it is extensively used for translational  
90 medicine<sup>32,35,36</sup>. Previous studies showed that SARS-CoV-2 replicates efficiently in the  
91 respiratory tract of hamsters and is able to invade the central nervous system, with no  
92 differences observed between animals of different age<sup>35</sup>. Histopathological and radiographic  
93 evaluations confirmed that these animals develop severe pneumonia without showing severe  
94 clinical manifestations and fully recover in 2-3 weeks<sup>35,37</sup>. In addition, preliminary studies  
95 showed that hamsters increase the gene expression of some cytokines/chemokines in the  
96 lungs, which may be compatible with the cytokine storm described in humans<sup>38</sup>. The aim of  
97 this study is to provide an in-depth evaluation of the Syrian hamster as animal model for  
98 human COVID-19, and to identify the advantages and disadvantages of using this species for  
99 translational medicine. Our work provides new outcomes to take into account while

100 designing an infection study using this animal model, including evidence for sex-related  
101 differences.

## 102 Results

103 **Infection and seroconversion.** Syrian hamsters intranasally infected with the B.1.1.7 SARS-  
104 CoV-2 VOC developed no clinical signs, except for a 5% drop in body weight between 2 and  
105 6 days post infection (dpi), with subsequent recovery (Fig. 1a; Supplementary Table 1). Viral  
106 shedding started at 2 dpi, peaked between 4 and 6 dpi depending on the sex and dropped  
107 shortly after. Virus genome was detectable until 14 dpi with high CT values; males showed  
108 higher shedding across the whole study period ( $P < 0.0001$ , Fig. 1b) with a mean delta of 3.6  
109 CT (Fig. 1b; Supplementary Table 1).

110 All infected individuals produced detectable neutralizing antibodies against SARS-CoV-2  
111 from 6 dpi, reaching the highest titers 14 dpi (Fig. 1c). Geometric mean titers (GMT) were  
112 higher in males rather than females, but the difference was not statistically significant.

113 SARS-CoV-2 established a productive infection in the lungs, with viral RNA detected in all  
114 individuals with decreasing viral load over time (Fig. 1d). We confirmed these results by  
115 showing the presence of the spike protein in the pulmonary parenchyma of all individual  
116 using immunofluorescence. Interestingly, the lungs of male hamsters collected 6 dpi also  
117 showed a marked expression of double-strand RNA (dsRNA), which is an indicator of active  
118 viral replication, whereas only a weak signal could be observed in the lungs of the females at  
119 the same time point (Fig. 1e). Mock animals did not stain for any of the tested antibodies,  
120 confirming the specificity of reactions. Evidence for SARS-CoV-2 infection in the intestines  
121 and brains was far less marked, with low viral load and inconsistent results within the  
122 infected groups. On day 14, only one individual was positive for each group in both organs  
123 (Fig. 1d). Coherently with these results, immunofluorescence staining for viral spike  
124 glycoprotein and ds-RNA was evident only in the intestinal sections of two males at 2 dpi  
125 (Supplementary Fig. 1a).

126 **Pathology.** Lungs of male hamsters were diffusely consolidated with dark-red coloration at  
127 day 6, while multiple dark-red consolidated areas were scattered throughout all lobes of  
128 females. At 14 dpi, we observed few small reddish foci independently of the sex.

129 Histopathological changes in the lungs were consistent with a bronchointerstitial pneumonia  
130 (Fig. 2a-c), with cumulative histopathological score peaking on day 6 in both sexes (Fig. 2d;  
131 Supplementary Table 2). At 2 dpi, main histopathological changes consisted in mild-to-  
132 moderate alveolar damage, with alveolar activated macrophages, few neutrophils and  
133 vascular hyperemia (Fig. 2a). At 6 dpi, extensive and coalescing inflammatory foci with  
134 parenchymal consolidation affected more than 75% of the surface in 3 individuals, 50-75% in  
135 5, and 25-50% in 2 females. In all animals, alveolar damage was associated with intense  
136 pneumocyte type II and bronchiolar epithelium hyperplasia (Fig. 2b and Fig. 2g.1). We  
137 detected scattered syncytial multinucleated cells in bronchioles and alveolar surfaces that, in  
138 one case, contained 2-4  $\mu\text{m}$  amphiphilic round cytoplasmic inclusions consistent with viral-  
139 like particles (Fig. 2g.2). At this stage, edema and infiltration of inflammatory cells  
140 (perivascular lymphomonocytic cuffs, alveolar macrophages and neutrophils) were moderate-  
141 to-severe, slightly more abundant in males (Fig. 2e, f and Supplementary Table 2). Pre- and  
142 post-capillary vasculature exhibited plumped reactive endothelium with sub-endothelial  
143 infiltration of lymphocytes, monocytes and rare neutrophils in most animals, consistent with  
144 endothelialitis<sup>39</sup> (Fig. 2g.3). The infiltration of inflammatory cells decreased by day 14 when  
145 only few lymphocytes, plasma cells and histiocytes surrounding the alveolar ducts were  
146 observed. Alveoli adjacent to terminal/respiratory bronchioles were multifocally lined by  
147 cells resembling bronchiolar epithelium (alveolar bronchiolization)<sup>40,41</sup> (Fig. 2g.4). There was  
148 no evidence of fibroplasia and reparative fibrosis (Fig. 2c).

149 Intestines and brains showed no gross nor histologically detectable lesions (Supplementary  
150 Fig. 1b-c).

151 **Host response to SARS-CoV-2 infection.** To study male and female host response against  
152 SARS-CoV-2, we performed an RNA-Seq analysis on lungs, intestines, brains and peripheral  
153 blood mononuclear cells (PBMCs) at three different time points. The comparison of the  
154 expression profile of all tissues from infected and mock individuals of the same sex and time  
155 point allowed us to quantify and describe the host response in terms of differentially  
156 expressed genes (DEGs) (Supplementary Table 3-4). In the lungs, response began at 2 dpi,  
157 reached the apex at 6 dpi and was still persistent in the latest time point, with no substantial  
158 differences between male and female hamsters. Females PBMCs exhibited the same  
159 parabolic curve observed in the lungs, while males elicited a stronger systemic response  
160 involving more than 2000 DEGs throughout the study (Fig. 3a-b and Supplementary Table 3-  
161 4). In intestines and brains, consistently with viral presence and replication, we observed that  
162 host response was far less marked. In both organs, females and males followed opposite  
163 trends, with DEGs number increasing in females and decreasing in males (Fig. 3b). We then  
164 employed Gene Ontology (GO) resource to investigate biological processes enriched in  
165 SARS-CoV-2-infected Syrian hamsters (Supplementary Table 5). Except for the intestines of  
166 males that showed many enriched GO terms, the number of enriched processes followed the  
167 same trend of DEGs in all tissues and sexes (Fig. 3c).

168 To better investigate how Syrian hamster respond to SARS-CoV-2, we focused on GO terms  
169 associated to the immune response and correlated biological functions. In the lungs, some GO  
170 terms showed the same pattern of enrichment across sexes, being activated in all the infected  
171 hamsters at 2 dpi (e.g. “cellular response to type I interferon”), 6 dpi (e.g. “T cell receptor  
172 signaling pathway” and “response to interferon-gamma”) or both (e.g. “inflammatory  
173 response”, “defense response to virus”, “activation of immune response”, “cytokine-mediated  
174 signaling pathway”) (Fig. 4a). On the other hand, at 6 dpi some GO terms were exclusively  
175 enriched in males (e.g. “angiogenesis” and “negative regulation of immune system process”) or  
176 exclusively in females (“regulation of B cell differentiation”) (Fig. 4a).

177 In both intestines and brains, we did not find a clear inflammatory pattern in response to the  
178 infection with SARS-CoV-2.

179 In the intestines we found few GO terms related to the immune system. At 2 dpi, “positive  
180 regulation of innate immune response”, “defense response to virus” and “cellular response to  
181 interferon-alpha”, were enriched in both sexes, while “cellular response to interferon-beta”  
182 and “toll-like receptor signaling pathway” were specifically enhanced in males. Only three  
183 GO terms of very general means (e.g. “inflammatory response”) were enriched at 6 dpi, while  
184 at 14 dpi we detected GO terms related to lesions recovery, such as “wound healing”, and  
185 “tissue regeneration”. At this time point, we noted few sex-specific enriched terms, such as  
186 “positive regulation of T cell differentiation”, “lymphocyte differentiation” and “B cell  
187 activation” in males and “antigen receptor-mediated signaling pathway”, “chemokine-  
188 mediated and cytokine-mediated signaling pathways” in females.

189 In the brains, few GO terms were enriched in both sexes exclusively 2 dpi, including  
190 “activation of immune response”, “complement activation”, “defense response to virus”,  
191 “cellular response to interferon-alpha and -beta” (Fig. 4c).

192 As a major novelty of this study, we analyzed the immunological profile of PBMCs to  
193 investigate the Syrian hamster systemic activation of the immune system, searching for  
194 potential similarities with human severe COVID-19 cases. We observed the activation of the  
195 immune response in both sexes in all the three time points, as expressed by longitudinal  
196 enrichment of related GO terms such as “cytokine/chemokine-mediated signaling pathway”,  
197 “regulation of lymphocyte activation”, “inflammatory response”, “programmed cell death”

198 and “defense response to virus” (Fig. 5a). Other GO terms enriched in both sexes during the  
199 experiment at any time point, included “complement activation”, “antigen processing and  
200 presentation of peptide antigen via MHC class I”, “positive regulation of innate immune  
201 response” and “toll-like/pattern recognition receptor signaling pathway”. Some GO terms  
202 were enriched in a sex-specific manner, such as “regulation of autophagy” and “lymphocyte  
203 differentiation in males”, or “cellular response to interferon-alpha” and, “alpha-beta T cell  
204 activation” in females. In particular, we observed major differences between females and  
205 males at 14 dpi, when 98% of the up-regulated genes (2676/2723) were male-specific and  
206 60% of down-regulated genes (401/672) were female-specific (Fig. 5b and Supplementary  
207 Table 4).

208 **Syrian Hamster as immunological model for COVID-19.** To investigate whether hamsters  
209 display the typical immunological profiles described in COVID-19 lungs, we evaluated the  
210 expression levels of 100 genes associated to a severe human condition (Fig. 6a). Syrian  
211 hamsters activated an Interferon-I (IFN-I)-mediated cell-specific response to the virus at 2  
212 dpi, as shown by the up-regulation of many interferon stimulated genes (ISGs). This included  
213 genes coding for IFIT proteins (e.g. *Ifit2*, *Ifit3*), members of the OAS family (e.g. *Oas1*,  
214 *Oas2*, *Oas3*, *Oasl*), interferon regulatory factors (e.g. *Irf7* and *Irf9*) and several genes  
215 involved with cellular mechanisms of antiviral response (e.g. *Ddx60*, *Parp12* and *Parp14*).  
216 Specific immune response increased in both sexes at 6 dpi, with upregulation of 58 and 50  
217 out of 100 target genes for males and females respectively. SARS-CoV-2- infected animals  
218 promoted immune cell recruitment with complement activation, immunoglobulin-mediated  
219 response, and strong upregulation of pro-inflammatory cytokines (e.g. *Ccl2*, *Ccl3*, *Cxcl10*, *Il6*  
220 and *Ifny*) moreover, we observed activation of genes involved in monocyte (*Cd33*, *Cd16* and  
221 *Siglec1*) and T-cell activation (*Tbx21*, *Cd40lg*, *Cd4*, *Cd8a* and *Cd8b*). At 6 dpi males also up-  
222 regulated genes associated with active neutrophils recruitment (e.g. *Mmp9*, *Cd11c*, *Fut4* and  
223 *Elane*) and angiogenesis (e.g. *Mmp3*, *Thbs1* and *Angptl4*) (Fig. 6a). Interestingly, male  
224 hamsters downregulated both SARS-CoV-2 receptor *Ace2* and its receptor *Agtr1* genes. Of  
225 note, immunofluorescence staining for ACE2 expression confirms the sex-specific reduction  
226 of the receptor in lung tissue compared to mock controls (Fig. 6b). Hamsters of both sexes  
227 shut down almost completely the specific pulmonary immune response by day 14, with no  
228 individual perpetuating the immune exasperation and inflammation typical of severe COVID-  
229 19.

230 Among 32 key immunological genes associated to a severe COVID-19 systemic pathology in  
231 humans, 24 were differentially expressed in hamsters’ PBMCs in at least one case (Fig. 6c).  
232 Our results present a male-biased up-regulation of genes associated with immature  
233 neutrophils activation (e.g. *Cd49d*, *Cd274*, *Tlr4* and *Cd43*) and pro-inflammatory cytokines  
234 associated with the cytokine storm (*Il1 $\beta$* , *Il6* and *Tnf*). In this context, the longitudinal  
235 monitoring of pro-inflammatory IL-1 $\beta$  and IL-6 revealed their low release in the serum in  
236 response to SARS-CoV-2 infection, with exclusive increase in circulating levels of IL-1 $\beta$  in  
237 male hamsters at 14 dpi (Fig. 6d; Supplementary Fig. 2).

238

## 239 Discussion

240 Following the declaration of the COVID-19 pandemic by WHO in March 2020, both the  
241 scientific community and health authorities were on the frontline for the development of  
242 control measures to limit the spread of the infection and mitigate disease severity. To achieve  
243 this goal translational animal models were used to elucidate the pathogenesis of the disease  
244 and to rapidly assess the efficacy of prophylactic and therapeutic agents. However, in order  
245 for scientists to select the best animal model for their studies, it is crucial to characterize in  
246 which way a species can mimic the host-pathogen relationship between humans and SARS-  
247 CoV-2. In this study, we provide a comprehensive description for the Syrian hamsters that,  
248 also before the emergence of SARS-CoV-2, was an animal model used extensively to study  
249 other zoonotic emerging diseases, including bunyaviruses, arenaviruses, henipaviruses,  
250 flaviviruses, alphaviruses, filoviruses, as well as the coronaviruses SARS-CoV and MERS-  
251 CoV<sup>42</sup>. We performed experimental infections using SARS-CoV2 B.1.1.7 strain or Alpha  
252 VOC, isolated in Italy. The Alpha VOC was first detected in November 2020 in the United  
253 Kingdom and rapidly spread all across Europe, being responsible for increased of infections  
254 during the second epidemic wave. Compared to older strains, this variant was associated with  
255 higher transmissibility and, according to some studies, increased mortality rates. In Italy, it  
256 was the most prevalent variant between February and March 2021<sup>43,44</sup>. In our study, we  
257 successfully infected all the hamsters, detecting SARS-CoV-2 in tissues and oropharyngeal  
258 swabs from day 2 to 14 and specific antibody response by day 6, supporting earlier  
259 evidences<sup>35,45</sup>. In addition, we confirmed the presence of the antigen within pulmonary tissue  
260 up to 14 dpi through immunofluorescence, using a specific antibody directed towards the  
261 spike protein. On the other hand, the use of another antibody that is generally directed  
262 towards dsRNA, showed positive staining only in male lungs at 6 dpi. As dsRNA is a  
263 replicative intermediate of many RNA viruses, coronaviruses included<sup>46,47</sup>, this result  
264 indicates a higher replication rate in males at 6 dpi, even if it did not translate into an evident  
265 increase in the molecular detection of the virus using ddPCR. In this sense, paired  
266 immunofluorescence and molecular investigations performed at intermediate timepoints  
267 might have helped elucidating the dynamics of viral infection and replication within the  
268 pulmonary tissue of female and male hamsters.

269 SARS-CoV-2-infected hamsters developed a moderate-to-severe bronchointerstitial  
270 pneumonia mimicking histological patterns observed in COVID-19 patients (i.e. diffuse  
271 alveolar damage, interstitial and intra-alveolar influx of macrophages/neutrophils and  
272 pulmonary vascular endothelialitis), as previously described<sup>35,38,45,48</sup>. Alveolar damage is  
273 milder, unevenly distributed, with no formation of hyaline membranes typical of human  
274 COVID-19<sup>33,49-51</sup>.

275 Despite lung damage, hamsters showed no clinical signs but a significant loss in body weight  
276 that resolved spontaneously by day 14 post-infection. This result is consistent with previous  
277 reports, although few studies also reported symptoms as lethargy, ruffled fur, hunched back  
278 posture and rapid breathing<sup>45</sup>, a difference that might be related with the virus (i.e. titer and  
279 route of inoculum or viral strain)<sup>35,52</sup>, the hamsters (i.e. age)<sup>35,53</sup> or a combination of both<sup>35</sup>.

280 While it is known that prey species such as hamsters mask their sickness in presence of a  
281 perceived threat such as humans<sup>54</sup>, these data suggest that disease in hamsters mostly  
282 resembles that found in humans with mild COVID-19 symptoms. In humans, severe COVID-  
283 19 is associated with tissue damage due to an exacerbated inflammatory response<sup>18</sup> and  
284 multi-organ failure as secondary effect of systemic activation and exhaustion of the immune  
285 system<sup>55,56</sup>, or due to viral spread outside the respiratory system<sup>57,58</sup>. In our study, we  
286 investigated viral spread and hamsters' immune response at local and systemic level, in order

287 to evaluate the differences between our animal model and severe cases of COVID-19 in  
288 humans.

289 Hamsters mostly responded to SARS-CoV-2 in the lungs within the first week, with  
290 subsequent silencing by the end of the experiment that paired the recovery from the clinical  
291 disease, the clearance of the infection and the repair of pathological lesions. Most DEGs and  
292 GOs were associated to the immune response and related biological functions, including the  
293 activation of IFN-I alpha and beta, which was previously described by Hoagland and  
294 colleagues<sup>38</sup>. These molecules are crucial for effective antiviral response because they  
295 counteract viral replication in infected cells and cell-to-cell spread, enhance antigen  
296 presentation, and promote the development of the adaptive immune response<sup>59,60</sup>. Despite the  
297 induction of interferons is dampened after infection with SARS-CoV-2 compared to other  
298 viruses such as Influenza A<sup>13,61</sup>, IFN-I signalling influences the severity of COVID-19 in  
299 humans. Alterations in TLR3-dependent and TLR7-dependent type I interferon induction, the  
300 presence of autoantibodies to interferon and, in general, the reduced induction of local and  
301 systemic interferon responses against SARS-CoV-2 infection lead to severe manifestations<sup>13</sup>.  
302 Indeed, restricted IFN-I response might promote longstanding active viral replication,  
303 excessive production of pro-inflammatory cytokines and influx of neutrophils and  
304 monocytes, which act as further sources for pro-inflammatory mediators and promote greater  
305 tissue damage<sup>18</sup>. In this context, it is likely that the early and powerful induction of IFN-I  
306 related genes that we described in hamsters promotes fast viral clearance in the lungs and  
307 tissue structure restoration, and prevents severe manifestations of the disease in this animal  
308 model. Our data show that, similar to humans, also hamsters respond to the infection with  
309 local inflammation, recruitment of immune cells, activation of the complement and  
310 immunoglobulin-mediated response, and release of pro-inflammatory cytokines. However,  
311 such a response is contained in this animal model and shut down by day 14 post-infection.  
312 Furthermore, PBMCs RNA-Seq data showed a modest systemic response in hamsters that  
313 resolves within two weeks, with activation of the interferon pathway, innate cell recruitment  
314 and activation of lymphocytes B and T and immunoglobulin-mediated immune response.  
315 Modest increase in circulating levels of the pro-inflammatory cytokines further corroborates  
316 previous studies<sup>62,63</sup> and highlights another crucial difference with patients suffering from  
317 complicated COVID-19 that present almost 3-fold higher levels of pro-inflammatory  
318 cytokine IL-6 compared to patients with an uncomplicated form of the disease<sup>64</sup>. Overall, our  
319 data suggest that hamsters do not suffer of any dysregulation of the immune system that  
320 might determine severe COVID-19 in humans.

321 Consistently with the low systemic activation of the immune system that in humans promotes  
322 tissue damage in peripheral districts, we discovered that there were no histopathological  
323 lesions in the intestines and brains of the hamsters. In addition, our ddRT-PCR data support  
324 other studies in showing limited spread of SARS-CoV-2 outside the respiratory tract in this  
325 species<sup>35</sup>. The lower or absent systemic infection in hamsters compared to humans, where the  
326 virus can spread to the digestive tract, the brain, the heart, the kidneys, the sweat glands of  
327 the skin and the testicles<sup>57,58</sup> further explains the fewer complications seen in this model.  
328 Interestingly, we found positive staining in immunofluorescence for the spike and dsRNA  
329 supporting replication of the virus in the intestines, with transcriptomic analyses showing  
330 weak and generic immune response. While the lack of studies on the transcriptome of human  
331 intestines during COVID-19 prevents us from making significant comparisons with our  
332 animal model, infection of human small intestinal organoids resulted in much higher  
333 transcriptomic signal<sup>65</sup>. On the other hand, the minimal alterations shown in our analyses  
334 could simply result from enterocytes sloughing following fasting and weight loss.

335 In our study, all data supported that infection with SARS-COV-2 has more severe  
336 consequences in male hamsters. Indeed, males developed more diffuse and severe lung



337 lesions, characterized by higher scores of infiltration of inflammatory cells and edema, which  
338 may have resulted in the more obvious pathological manifestations. Thanks to the  
339 combination of several approaches, our study allowed us to investigate the possible causes  
340 and consequences of such a difference. Of note, we found in lungs, males display a higher  
341 differential expression of genes associated with activated neutrophils and alveolar  
342 macrophages and with the release of pro-inflammatory cytokines associated to ARDS, such  
343 as *Il-6*, *Cxcl10* and *Ifn* $\gamma$ . This sex-based difference has been evidenced in human COVID-19  
344 cases<sup>66-69</sup> but it had not been previously reported for animal models, where the transcriptome  
345 of infected hamsters was mainly investigated using RT-qPCR rather than RNA-Seq  
346 analysis<sup>53,70,71</sup>. Another peculiarity of male hamsters standing out from our data is the  
347 differential expression of genes promoting angiogenesis (e.g. *Mmp3*, *Thbs1* and *Angptl4*),  
348 that might explain sex-driven differences in the pulmonary lesions. Finally, male hamsters  
349 downregulate both *Ace2* and its receptor *Agtr1* at day 6, a feature that we were able to  
350 identify using transcriptomic analyses and to confirm through immunofluorescence, showing  
351 a decreased level of the receptor within pulmonary tissue between non-infected and infected  
352 animals. As the receptor gets endocytosed together with the virus during cellular infection, it  
353 is possible that this difference is due to a higher level of infection and replication of SARS-  
354 CoV-2 in males. Consistently with this hypothesis, we observed a high viral load by ddRT-  
355 PCR and a peculiar staining for dsRNA in the lungs of male hamsters. Other than being  
356 SARS-CoV-2 cellular receptor, ACE2 has the physiological function of inactivating  
357 angiotensin II (AII) molecules produced by ACE, known for its vasoconstrictive activities  
358 and, crucially, for acting as a potent pro-inflammatory cytokine<sup>18</sup>. As a further notice,  
359 increased level of AII can also exacerbate IL-6 signaling. In this context, several cytokine  
360 storm cytokines<sup>55,72</sup> as *Il-6*, *Il-1* $\alpha$  and *Tnf* and genes associated with immature neutrophils  
361 activation (e.g. *Itga4*, *Cd274* and *Spn*) were specifically up-regulated in PBMCs from male  
362 hamsters only. Similarly, males showed a peculiar increase in serum levels of IL-1 $\beta$  at 14 dpi  
363 that was not observed in females, thus suggesting a possible re-acerbation of the systemic  
364 inflammation.

365 These evidences further corroborate a sex-mediated difference in the pathology of COVID-19  
366 in hamsters that could provide useful insights to understand similar evidences in humans.  
367 Indeed, studies worldwide support that more men than women require intensive care or  
368 succumb to the disease<sup>15</sup>. While it has been suggested that social and behavioral differences  
369 between genders might influence the progression of COVID-19, our data support the role of  
370 the biological sex. Finally, the longitudinal assessment of oropharyngeal swabs showed that,  
371 while showing akin kinetics, males eliminate more virus, suggesting sex-driven differences  
372 also in the epidemiology of the pandemic.

373 In conclusion, our study provides a comprehensive evaluation of the Syrian hamster as  
374 animal model for COVID-19. Overall, we confirmed that the infection with SARS-CoV-2  
375 shows similar pathways in humans and hamsters, which proved to be an excellent model to  
376 test the efficacy of prophylactic biologicals, such as vaccines, and to quickly assess the  
377 phenotypic changes of new VOCs. However, our study underlines that hamsters only mimic  
378 mild-to-moderate COVID-19 and do not replicate the exacerbation of the immune response,  
379 which is the cause of severe human cases. In this context, hamsters should be used with  
380 caution to evaluate therapeutic agents dampening the immune response. As a final note, we  
381 were able to observe a significant difference between female and male hamsters that should  
382 be taken into account when designing any experimental study. While this feature is likely not  
383 peculiar to the SARS-CoV-2 infection, the sex-biases of animal experiments has long  
384 represented a critical aspect of translational medicine<sup>73</sup>. Fortunately, researchers, funders and  
385 policy makers unanimously acknowledge the need for a change; research projects that include  
386 both sexes and analyses of data by gender – as in the present study - are becoming more and

387 more popular. In turn, we believe that animal models will progressively become important  
388 not only to describe disease pathological pathways but also to grasp differences related to  
389 biological sex.  
390

## 391 **Materials and Methods**

392 **Animal experiment.** The study involved 60 8-weeks old Syrian hamsters divided in 4  
393 experimental groups of 15 individuals each (infected and mock females and males). Animals  
394 were acclimatized 7 days prior to infection in individual cages (BCU-2 Rat Sealed Negative  
395 Pressure IVC, Allentown Inc) within the biosafety level 3 (BSL3) facility, following national  
396 and international regulations on the welfare of laboratory animals.

397 Animals were inoculated intranasally under general anesthesia with Isoflurane using  $8 \times 10^4$   
398 PFU/100 $\mu$ l of SARS-CoV-2, B.1.1.7 variant (Accession N: EPI\_ISL\_766579)<sup>74</sup>. Control  
399 animals were inoculated using 100 $\mu$ l of sterile PBS solution.

400 Animals were daily monitored for 14 days to record clinical signs. At 2, 4, 6, 9 and 14 dpi we  
401 registered weights and collected oropharyngeal swabs and blood samples from the gingival  
402 vein under general anesthesia<sup>75</sup>. At day 2, 6 and 14 we euthanized 5 individuals per group and  
403 performed an intra-cardiac terminal blood collection for PBMCs isolation with Ficoll-Paque  
404 Plus (GE healthcare) (Supplementary Fig. 3). We performed a complete necropsy of all  
405 animals and collected samples of the lungs, brains and intestines. Specimens were fixed in  
406 10% neutral-buffered formalin and in RNA later (Thermo Fisher®) for histological  
407 examination and molecular analyses respectively. Further details can be found as  
408 supplementary materials.

409 **Histology and immunofluorescence.** Formalin fixed samples were paraffin-embedded, cut  
410 in 4 $\mu$ m-thick sections and stained with hematoxylin and eosin (H&E) to evaluate the  
411 presence and severity of lesions in different organs. Histological lesions were scored  
412 according to<sup>38</sup> (Supplementary Table 1). Slides were analyzed and images were taken using a  
413 Leica DM4 B light microscope with a DFC450 C Microscope Digital Camera at 20X and the  
414 software Leica Application Suite V4.13 (Leica Microsystems, Wetzlar, Germany).

415 We investigated the presence of the virus within tissues by immunofluorescence, using anti-  
416 SARS-CoV-2 spike glycoprotein and anti-dsRNA<sup>46,76</sup> as primary antibodies in order to  
417 discriminate the presence of the antigen by the active replication of the virus within tissues,  
418 based on the fact that dsRNA is widely known as replicative intermediate for coronaviruses<sup>47</sup>.  
419 Immunofluorescence was also applied to investigate the expression of the ACE-2 receptors  
420 within tissues. Further details can be found as supplementary materials and in Supplementary  
421 Table 6.

422 **Molecular analyses for SARS-CoV-2 detection and quantification.** The presence of viral  
423 RNA in oropharyngeal swabs was determined in all the control and infected individuals by  
424 qualitative rRT-PCR using the AgPath-ID™ One-Step RT-PCR Reagents (Life  
425 Technologies) on a CFX96 Touch Deep Well Real-time PCR Detection System (Biorad). To  
426 quantify SARS-CoV-2 in target organs, we developed a digital droplet RT-PCR (RT-ddPCR)  
427 employing the One-Step RT-ddPCR Advanced Kit for Probes (Bio-Rad) and the QX200  
428 Droplet Digital PCR System (Biorad). This approach was implemented only for the three  
429 individuals per experimental group that were randomly selected for transcriptomic analyses.  
430 Quantitative data were expressed as Log<sub>2</sub> genome copies (GC)/ml RNA. Both tests targeted  
431 SARS-CoV-2 envelope protein (E) gene<sup>77</sup>. The quality of the samples was verified by  
432 amplification of the  $\beta$ -actin mRNA<sup>78</sup>. Further details can be found as supplementary  
433 materials.

434 **Gene expression analyses by RNA-Seq.** We randomly selected three individuals among five  
435 of each experimental group to investigate virus-host response by performing the  
436 transcriptomic profile of the lungs, brains, intestines and PBMCs of infected *versus* mock

437 animals at three different time points along the infection, representing early infection, the  
438 infection apex and recovery.

439 Libraries were prepared with the Truseq Stranded mRNA library preparation kit (Illumina),  
440 following manufacturer's instructions and were run on an Agilent 2100 Bioanalyzer using an  
441 Agilent High Sensitivity DNA kit (Agilent Technologies) to ensure the proper range of  
442 cDNA length distribution. Sequencing was performed on Illumina NextSeq with NextSeq®  
443 500/550 High Output Kit v2.5 (300 cycles; Illumina) in pair-end [PE] read mode producing  
444 about 33 million reads per sample. After filtering raw data, we aligned high-quality reads  
445 against the reference genome of *Mesocricetus auratus* (BCM Maur 2.0, NCBI)<sup>79</sup> using STAR  
446 v2.7.9a<sup>80</sup> and generated the gene count using htseq-count v0.11.0<sup>81</sup>. We then investigated the  
447 differential expression of genes between infected and mock males and females at each time  
448 point with Deseq2 package<sup>82</sup> and assigned Gene Ontology (GO) terms to each gene using  
449 Blast2GO v5.2.5<sup>83</sup>. Child-father relationships belonging to GO graph were reconstructed  
450 using the OBO file downloaded from <http://geneontology.org/> (accessed on 19/10/2021).  
451 Orthologs with *Homo sapiens*, *Mus musculus* and *Rattus norvegicus* were computed using  
452 Orthofinder v2.5.4<sup>84</sup> and their proteome downloaded from Ensembl. Further details can be  
453 found as supplementary materials.

454 **Serological analyses.** In order to evaluate sero-conversion dynamics, we performed the focus  
455 reduction neutralization test (FRNT) as previously described, using for the detection of  
456 neutralizing antibodies the same viral strain used for the infection<sup>85,86</sup>. We defined as serum  
457 neutralization titer the reciprocal of the highest dilution resulting in a reduction of the control  
458 focus count higher than 90% (FRNT90). Sera of all animals were collected at 2, 4, 6, 9 and  
459 14dpi; only 4 out of 5 sera were collected for both males and females at 9 dpi.

460 We further analyzed serum samples of all the controls and infected animals at 2, 4, 6, 9 and  
461 14dpi for the presence of pro-inflammatory cytokines. Levels of IL-1 $\beta$  and IL-6 were  
462 assessed at the Istituto Zooprofilattico Sperimentale della Sardegna through singleplex  
463 ELISA using target-specific ELISA kits (MyBiosource), according to the manufacturers'  
464 instructions and using an Epoch microplate reader (BioTek) to read absorbance.

465 **Statistical analyses.** We adopted the minimum sample size that guaranteed effective  
466 comparison while minimizing the use of experimental animals. Infection of 13 out of 15  
467 individuals per group indicated successful infection with a first type error  $\alpha=0.01$  (one tail)  
468 and a power  $1-\beta=0.85$ .

469 To summarize viral shedding in males and females and to record changes in hamsters'  
470 weights during infection of males and females *versus* the corresponding group of mock  
471 animals, we performed descriptive statistical analysis using SAS 9.4 software<sup>87-89</sup>. We  
472 applied a spline mixed model by sex, taking into account the correlation among observation  
473 of the same hamster over time using a first-order autoregressive AR(1) structure for the  
474 covariance matrix (see supplemental materials for further details on the model). For all the  
475 remaining statistical analyses, we used a Mann-Whitney test for independent parameters  
476 implemented in GraphPad Prism 9. These included comparison between mean antibody titers  
477 and serum levels of IL-1 $\beta$  and IL-6 of females *versus* males at each time point and between  
478 histological scores of infected *versus* mock animals of each sex at 2, 6 and 14 dpi. For all  
479 statistics, we considered as significant P-values  $< 0.05$ .

## 480 **Data availability**

481 RNA-Seq raw data generated for the present study were deposited in SRA under accession  
482 number PRJNA839918. Source data for Figures 1a-b; 2d-f; 3a-c; 4a-c; 5a-b; 6ba, c are  
483 provided as supplementary tables.

484

## 485 **Ethical statement**

486 Animal studies were performed in compliance with directive 2010/63/EU of the European  
487 Parliament and of the Council of 22 September 2010 on the protection of animals used for  
488 scientific purposes. The experimental design was approved by IZSVE ethical board and by  
489 the Italian Ministry of Health, under permit n. 1167/2020-PR. In accordance with the 3Rs  
490 principle (Replacement, Reduction and Refinement), we used the minimum number of  
491 animals that secured statistically sound results and provided best housing and environmental  
492 enrichment. Briefly, individual housing exceeded the minimum surface required and agreed  
493 with the ecology, behavior and biology of the species. Temperature, humidity and light-dark  
494 cycles were fixed ( $21 \pm 3$  °C,  $50 \pm 10\%$ , lights off: 07:00 AM–07:00 PM) and monitored  
495 throughout the study. All animals had *ad libitum* access to food and water throughout the  
496 entire study. Environmental enrichment consisted of gnawing blocks, nesting material and  
497 extra sunflower seeds three times a week. We guaranteed daily monitoring of animals' health  
498 and comfort and established a humanitarian threshold to avoid unnecessary suffering.  
499 Animals were bred *in house* at the Istituto Zooprofilattico Sperimentale delle Venezie, under  
500 permission N n°2020/0095 granted by the municipality of Legnaro on August 2020.

## 501 **Funding**

502 The present work was supported by the Italian Ministry of Health through the grant IZSVE  
503 01/20 RCS.

## 504 **Acknowledgements**

505 The authors would like to thank Francesco Bonfante to kindly provide the viral strain used in  
506 this study. We acknowledge Massimo Boldrin, Franco Mutinelli, Maria Augusta Bozza and  
507 the whole team of IZSVE's animal facilities for their support in the breeding and  
508 management of hamsters. We also thank Annalisa Salviato, Alessia Schivo, Miriam Abbadi,  
509 Lorena Biasini, Sara Petrin and Arianna Peruzzo for their training, support and precious  
510 suggestions on wet lab techniques for transcriptomic analyses. We also thank Giorgia  
511 Monetti for processing fixed organs and providing tissue slices for immunofluorescence and  
512 histological analyses. Finally, we are grateful to Francesca Ellero for her English edits on the  
513 manuscript.

## 514 **Author Contributions**

515 Funding acquisition and project administration: C.T., P.D.B and S.L.; supervision: S.C. and  
516 P.D.B.; resources: A.O., M.V., I.M., C.T. and P.D.B.; study design: M.C., G.Z., M.M.,  
517 P.D.B., and S.L.; animal experiments: M.C., M.Z., P.D., P.D.B. and S.L.; histology: Gr.F.  
518 and M.V.; molecular analyses: M.C., P.D., I.B. and V.P.; immunofluorescence: M.C.;  
519 transcriptomic analyses: M.C. and G.Z.; serology: A.B. and M.P.; ELISA: Gi.F.; statistics:  
520 M.M.; data interpretation: M.C., G.Z., Gr. F., Gi.F., S.C., P.D.B. and S.L.; writing (first  
521 draft): M.C., G.Z., Gr.F, Gi.F., M.M., V.P. and S.L.; writing (revision): all authors; Figures:  
522 M.C., G.Z., Gr.F., Gi.F., M.M. and S.L.

## 523 **Competing interests**

524 The authors declare no competing interests.

525

526

## 527 **Figures and figure legends**

528 **Figure 1. SARS-CoV-2 infection in oropharyngeal swabs, lungs and distal organs. a,**  
529 **Statistical model describing body weight changes in mock and infected male (Mock M, M)**  
530 **and female (Mock F, F) Syrian hamsters. b, Statistical model describing rRT-PCR results**  
531 **trend of RNA extracted from oropharyngeal swabs at 2, 4, 6, 9 and 14 dpi. a-b, Fig. 1 a-b:**  
532 **infected and control females 2 dpi n = 30; 4 dpi n = 20; 6 dpi n = 20; 9 dpi n = 10; 14 dpi n =**  
533 **10 infected and control males 2 dpi n = 30; 4 dpi n = 20; 6 dpi n = 20; 9 dpi n = 10; 14 dpi n**  
534 **= 10. See Supplementary Table 1 for further details. c, Focus reduction neutralization test**  
535 **(FRNT), expressed as the reciprocal of the highest dilution resulting in a reduction of the**  
536 **control focus count > 90% (FRNT90). Geometric means (GMT) with 95% confidence**  
537 **intervals (CI) are represented. Dotted line indicate the limit of detection (LOD). Mann-**  
538 **Whitney test male vs females; 2dpi  $P > 0.99$ , 4dpi  $P > 0.99$ , 6dpi  $P = 0.16$ , 9dpi  $P = 0.63$ ,**  
539 **14dpi  $P = 0.59$ . Infected females 2 dpi n = 5; 4 dpi n = 5; 6 dpi n = 5; 9 dpi n = 4; 14 dpi n =**  
540 **5 infected males 2 dpi n = 5; 4 dpi n = 5; 6 dpi n = 5; 9 dpi n = 4; 14 dpi n = 5. d, SARS-**  
541 **CoV-2 viral load as determined by RT-ddPCR in the lungs, intestines and brains at 2, 6 and**  
542 **14 dpi; results are expressed as Log<sub>2</sub> of Genomic Copies (GC)/ml for graphical comparison**  
543 **between organs. Infected female and male lungs and intestines: 2, 6 and 14 dpi n = 3 each**  
544 **infected female and male brains: 2 dpi n = 3; 6 dpi n = 2; 14 dpi n = 3 each. e, Representative**  
545 **immunofluorescence staining for SARS-CoV-2 Spike glycoprotein (green) and dsRNA (red)**  
546 **in infected male and female lungs. Scale bar = 25 $\mu$ m. All animals were analyzed,**  
547 **representative images are shown.**  
548

549 **Figure 2. SARS-CoV-2 infection results in severe but rapidly resolving pulmonary**  
550 **lesions in male and female Syrian hamsters. a, b, and c,** Representative images of Syrian  
551 hamster lungs collected at 2, 6 and 14 dpi and mock animals. H&E stained sections. Scale bar  
552 = 200  $\mu$ m. All animals were analyzed, representative images are shown. **d,** Cumulative score  
553 of lung pathology for nine histopathological assessments in male and female hamsters  
554 (Supplementary Table 2); mean values  $\pm$  SD are represented. Mann-Whitney test males vs  
555 females; 2dpi  $P = 0.86$ , 6dpi  $P = 0.31$ , 14dpi  $P = 0.72$ . **e and f,** Histopathological scores of  
556 intra-alveolar inflammatory cell infiltration and perivascular/alveolar edema in males and  
557 female hamsters (Supplementary Table 2; all animals were analyzed). Mean values  $\pm$  SD are  
558 represented. Mann-Whitney test mock animals vs females of total histopathological score  
559 (2dpi  $P = 0.0007$ , 6dpi  $P = 0.0003$ , 14dpi  $P = 0.0003$ ), intra-alveolar inflammatory cell  
560 infiltration (2dpi  $P = 0.0003$ , 6dpi  $P = 0.0003$ , 14dpi  $P = 0.0003$ ) and perivascular/alveolar  
561 edema (2dpi  $P > 0.99$ , 6dpi  $P = 0.0003$ , 14dpi = 0.52). Mann-Whitney test mock animals vs  
562 males of total histopathological score (2dpi  $P = 0.0007$ , 6dpi  $P = 0.0003$ , 14dpi  $P = 0.0003$ ),  
563 intra-alveolar inflammatory cell infiltration (2dpi  $P = 0.0003$ , 6dpi  $P = 0.0003$ , 14dpi  $P =$   
564  $0.0003$ ) and perivascular/alveolar edema (2dpi  $P = 0.19$ , 6dpi  $P = 0.0003$ , 14dpi  $> 0.99$ ).  
565 Mann-Whitney test male vs females of total histological score (2dpi  $P = 0.86$ , 6dpi  $P = 0.31$ ,  
566 14dpi  $P > 0.72$ ), intra-alveolar inflammatory cell infiltration (2dpi  $P > 0.99$ , 6dpi  $P = 0.21$ ,  
567 14dpi  $P > 0.99$ ) and perivascular/alveolar edema (2dpi  $P = 0.40$ , 6dpi  $P = 0.12$ , 14dpi  $>$   
568  $0.99$ ). \* indicates a statistically significant comparison. **g, 1,** Severe bronchiolar epithelium  
569 and pneumocyte II hyperplasia at 6 dpi; nuclei of proliferating cells were frequently megalic  
570 with prominent nucleoli and numerous mitotic figures. **2,** A syncytial epithelial cell  
571 containing multiple 2-4  $\mu$ m amphophilic round cytoplasmic viral-like inclusions, in a male  
572 hamster at 6 dpi. **3,** Lymphomonocytic endothelialitis and perivascular cuffing in a  
573 pulmonary venule at 6 dpi. **4,** Alveolar bronchiolization with acinar formations and few  
574 interstitial lymphoplasmacytic infiltration at 14 dpi. H&E stained sections. Images were  
575 acquired with a Leica DM4 B light microscope with a DFC450 C Microscope Digital Camera  
576 and the software Leica Application Suite V4.13 (Leica Microsystems). Scale bar = 50 $\mu$ m.  
577

578 **Figure 3. RNA-Seq global expression profiles. a**, Volcano and MA plot showing  
579 differential expression analysis results for lungs/intestine/brains and PBMCs, respectively  
580 (blue, up-regulated; red, down-regulated; gray, not significant). A DEG is significant in a  
581 comparison when  $\text{Log}_2\text{FC} \leq -1$  or  $\text{Log}_2\text{FC} \geq 1$  and  $\text{FDR} < 0.05$ . For lungs, intestines and brains:  
582 x axis =  $\text{Log}_2\text{FC}$ ; y axis =  $-\text{LogFDR}$ . For PBMCs: x axis = Log mean expression; y axis =  
583  $\text{Log}_2\text{FC}$ . **b**, Number of DEGs for every comparison infected vs mock, done in differential  
584 expression analysis; up- and down-regulated genes are shown. See also Supplementary Table  
585 4 for DEGs numbers. **c**, Number of enriched GO terms for every comparison infected vs  
586 mock done in Gene Ontology enrichment analysis. See also Supplementary Table 5 for GO  
587 terms numbers. Infected female and male lungs and intestines: 2, 6 and 14 dpi n = 3 each;  
588 infected female and male brains: 2 dpi n = 3; 6 dpi n = 2; 14 dpi n = 3 each; infected female  
589 and male PBMCs: a pool of 5 animals' blood was analyzed at each time point.  
590



591 **Figure 4. Transcriptomic profile of SARS-CoV-2 infected male and female Syrian**  
592 **hamsters. a,** Dotplot representing the most specific enriched Gene Ontology (GO) terms  
593 related to immunity in lungs. **b,** Dotplot representing the most specific enriched GO terms  
594 related to immunity in intestine. **c,** Dotplot representing the most specific enriched GO terms  
595 related to immunity in brain. Statistically significant enrichments ( $FDR < 0.05$ ) are presented  
596 and  $-\text{LogFDR}$  is shown.  
597

598 **Figure 5. Transcriptomic profile of SARS-CoV-2 infected male and female PBMCs. a,**  
599 **Dotplot representing the most specific enriched GO terms related to immunity in PBMCs.**  
600 **Statistically significant enrichments ( $FDR < 0.05$ ) are presented and  $-\text{LogFDR}$  is shown. **b,**  
601 **Scatterplot representing the  $\text{Log}_2\text{FC}$  of males and females DEGs in PBMCs at 14 dpi. DE =**  
602 **Differentially expressed. A DEG is significant in a comparison when  $\text{Log}_2\text{FC} \leq -1$  or**  
603  **$\text{Log}_2\text{FC} \geq 1$  and  $FDR < 0.05$ .**  
604**

605 **Figure 6. Transcriptomic analysis highlights differences in males and females systemic**  
606 **response to SARS-CoV-2 infection. a,** Heatmap (Log<sub>2</sub>FC values of the performed  
607 comparisons) of selected genes related to the immune system in the lungs. A DEG is  
608 significant in a comparison when Log<sub>2</sub>FC ≤ -1 or Log<sub>2</sub>FC ≥ 1 and FDR < 0.05. **b,**  
609 Immunofluorescence staining for SARS-CoV-2 receptor ACE2 in infected and control males  
610 and females lungs at 6 dpi; all animals were analyzed, representative images are shown. Scale  
611 bar = 25 μm. **c,** Heatmap (Log<sub>2</sub>FC values of the performed comparisons) of selected genes  
612 related to the immune system in the PBMCs transcriptome. \*indicates the gene name for  
613 hamsters in case it differs from the human ortholog. **d,** Singleplex ELISA levels (pg/mL) for  
614 mock and infected male and female hamsters IL-1β. Mann-Whitney tests of mock or SARS-  
615 CoV-2 M vs F; mean ± SEM is represented (\* indicates a statistically significant  
616 comparison).  
617

## 618 **References**

- 619 1. Zhu, N. *et al.* A Novel Coronavirus from Patients with Pneumonia in China, 2019. *N. Engl. J. Med.* **382**, 727–733 (2020).  
620
- 621 2. Berlin, D. A., Gulick, R. M. & Martinez, F. J. Severe Covid-19. *N. Engl. J. Med.* **383**,  
622 2451–2460 (2020).
- 623 3. Gandhi, R. T., Lynch, J. B. & del Rio, C. Mild or Moderate Covid-19. *N. Engl. J. Med.*  
624 **383**, 1757–1766 (2020).
- 625 4. Zhang, T., Wu, Q. & Zhang, Z. Probable Pangolin Origin of SARS-CoV-2 Associated  
626 with the COVID-19 Outbreak. *Curr. Biol.* **30**, 1346-1351.e2 (2020).
- 627 5. Holmes, E. C. *et al.* The origins of SARS-CoV-2: A critical review. *Cell* **184**, 4848–  
628 4856 (2021).
- 629 6. Fullard, J. F. *et al.* Single-nucleus transcriptome analysis of human brain immune  
630 response in patients with severe COVID-19. *Genome Med.* **13**, 1–13 (2021).
- 631 7. Spudich, S. & Nath, A. Nervous system consequences of COVID-19. **375**, 267–270  
632 (2022).
- 633 8. Chen, Z. R. *et al.* COVID-19 and gastroenteric manifestations. *World J. Clin. Cases* **9**,  
634 4990–4997 (2021).
- 635 9. Gagliardi, S. *et al.* Detection of SARS-CoV-2 genome and whole transcriptome  
636 sequencing in frontal cortex of COVID-19 patients. *Brain. Behav. Immun.* **97**, 13–21  
637 (2021).
- 638 10. Soltani Zangbar, H., Gorji, A. & Ghadiri, T. A Review on the Neurological  
639 Manifestations of COVID-19 Infection: a Mechanistic View. *Mol. Neurobiol.* **58**, 536–  
640 549 (2021).
- 641 11. Arunachalam, P. S. *et al.* Systems biological assessment of immunity to mild versus  
642 severe COVID-19 infection in humans. *Science (80-. ).* **6261**, eabc6261 (2020).
- 643 12. Tay, M. Z., Poh, C. M., Rénia, L., MacAry, P. A. & Ng, L. F. P. The trinity of  
644 COVID-19: immunity, inflammation and intervention. *Nat. Rev. Immunol.* **20**, 363–  
645 374 (2020).
- 646 13. Lamers, M. M. & Haagmans, B. L. SARS-CoV-2 pathogenesis. *Nat. Rev. Microbiol.*  
647 **20**, (2022).
- 648 14. Beltrame, A. *et al.* Association Between Sex Hormone Levels and Clinical Outcomes  
649 in Patients With COVID-19 Admitted to Hospital: An Observational, Retrospective,  
650 Cohort Study. *Front. Immunol.* **13**, 1–10 (2022).
- 651 15. Stanelle-Bertram, S. *et al.* SARS-CoV-2 induced CYP19A1 expression in the lung  
652 correlates with increased aromatization of testosterone-to-estradiol in male golden  
653 hamsters. (2020).

- 654 16. Takahashi, T. *et al.* Sex differences in immune responses that underlie COVID-19  
655 disease outcomes. *Nature* (2020) doi:10.1038/s41586-020-2700-3.
- 656 17. Zhang, B. *et al.* Clinical characteristics of 82 cases of death from COVID-19. *PLoS*  
657 *One* **15**, (2020).
- 658 18. Mohamed, L., Rokni, M., Mokhtari, T. & Noorbakhsh, F. Immunology,  
659 immunopathogenesis and immunotherapeutics of COVID-19; an overview. *Int.*  
660 *Immunopharmacol.* **93**, (2021).
- 661 19. Yang, Y. *et al.* Plasma IP-10 and MCP-3 levels are highly associated with disease  
662 severity and predict the progression of COVID-19. *J. Allergy Clin. Immunol.* **146**, 119-  
663 127.e4 (2020).
- 664 20. Russell, C. D. Exploiting an early immunological window of opportunity in COVID-  
665 19. *Lancet Respir. Med.* **9**, 811–812 (2021).
- 666 21. Harvey, W. T. *et al.* SARS-CoV-2 variants, spike mutations and immune escape. *Nat.*  
667 *Rev. Microbiol.* **19**, 409–424 (2021).
- 668 22. Graham, M. S. *et al.* Changes in symptomatology, reinfection, and transmissibility  
669 associated with the SARS-CoV-2 variant B.1.1.7: an ecological study. *Lancet Public*  
670 *Heal.* **6**, e335–e345 (2021).
- 671 23. Curran, J. *et al.* Transmission characteristics of SARS-CoV-2 variants of concern. *Rev.*  
672 *medRxiv* **2021**, 2021.04.23.21255515 (2021).
- 673 24. Vellas, C. *et al.* Influence of treatment with neutralizing monoclonal antibodies on the  
674 SARS-CoV-2 nasopharyngeal load and quasispecies. *Clin. Microbiol. Infect.* **28**,  
675 139.e5-139.e8 (2022).
- 676 25. Hwang, Y. C. *et al.* Monoclonal antibodies for COVID-19 therapy and SARS-CoV-2  
677 detection. *J. Biomed. Sci.* **29**, 1–50 (2022).
- 678 26. VanBlargan, L. A. *et al.* An infectious SARS-CoV-2 B.1.1.529 Omicron virus escapes  
679 neutralization by therapeutic monoclonal antibodies. *Nat. Med.* **28**, 490–495 (2022).
- 680 27. Thakur, S. *et al.* SARS-CoV-2 Mutations and Their Impact on Diagnostics,  
681 Therapeutics and Vaccines. *Front. Med.* **9**, (2022).
- 682 28. Yin, J. *et al.* Advances in the development of therapeutic strategies against COVID-19  
683 and perspectives in the drug design for emerging SARS-CoV-2 variants. *Comput.*  
684 *Struct. Biotechnol. J.* **20**, 824–837 (2022).
- 685 29. Chakraborty, C., Bhattacharya, M. & Sharma, A. R. Emerging mutations in the SARS-  
686 CoV-2 variants and their role in antibody escape to small molecule-based therapeutic  
687 resistance. *Curr. Opin. Pharmacol.* (2020).
- 688 30. Shi, J. *et al.* Susceptibility of ferrets, cats, dogs, and different domestic animals to  
689 SARS-coronavirus-2. 1–23 (2020).
- 690 31. Rockx, B. *et al.* Comparative Pathogenesis Of COVID-19, MERS And SARS In A

- 691 Non-Human Primate Model. *Science* (80-. ). **7314**, (2020).
- 692 32. Sia, S. F. *et al.* Pathogenesis and transmission of SARS-CoV-2 in golden hamsters.  
693 *Nature* **583**, 834–838 (2020).
- 694 33. Chan, A. J. F., Zhang, A. J., Yuan, S. & Kwok-, V. Simulation of the clinical and  
695 pathological manifestations of Coronavirus Disease 2019 (COVID-19) in golden  
696 Syrian hamster model: implications for disease pathogenesis and transmissibility.  
697 **2019**, 1–50 (2019).
- 698 34. Shou, S. *et al.* Animal Models for COVID-19: Hamsters, Mouse, Ferret, Mink, Tree  
699 Shrew, and Non-human Primates. *Front. Microbiol.* **12**, (2021).
- 700 35. Imai, M. *et al.* Syrian hamsters as a small animal model for SARS-CoV-2 infection  
701 and countermeasure development. *Proc. Natl. Acad. Sci. U. S. A.* **117**, 16587–16595  
702 (2020).
- 703 36. Muñoz-Fontela, C. *et al.* Animal models for COVID-19. *Nature* (2020)  
704 doi:10.1038/s41586-020-2787-6.
- 705 37. Armando, F. *et al.* SARS-CoV-2 Omicron variant causes mild pathology in the upper  
706 and lower respiratory tract of hamsters. *Nat. Commun.* **13**, (2022).
- 707 38. Hoagland, D. A. *et al.* Leveraging the antiviral type I interferon system as a first line of  
708 defense against SARS-CoV-2 pathogenicity. *Immunity* **54**, 557-570.e5 (2021).
- 709 39. Osterrieder, N. *et al.* Age-dependent progression of SARS-CoV-2 infection in syrian  
710 hamsters. *Viruses* **12**, 1–5 (2020).
- 711 40. O’Donnell, K. L. *et al.* Pathogenic and transcriptomic differences of emerging SARS-  
712 CoV-2 variants in the Syrian golden hamster model. *EBioMedicine* **73**, 1–32 (2021).
- 713 41. Hansen, F. *et al.* SARS-CoV-2 reinfection prevents acute respiratory disease in Syrian  
714 hamsters but not replication in the upper respiratory tract. *Cell Rep.* **38**, 110515 (2022).
- 715 42. Warner, B. M., Safronetz, D. & Kobinger, G. P. Syrian Hamsters as a Small Animal  
716 Model for Emerging Infectious Diseases: Advances in Immunologic Methods. *Adv  
717 Exp. Med. Biol. Microbiol. Infect. Dis. Public Heal.* (2016) doi:10.1007/5584.
- 718 43. Lai, A. *et al.* Circulating SARS-CoV-2 variants in Italy, October 2020–March 2021.  
719 *Virol. J.* **18**, 1–5 (2021).
- 720 44. Stefanelli, P. *et al.* Co-circulation of SARS-CoV-2 Alpha and Gamma variants in Italy,  
721 February and March 2021. *Eurosurveillance* **27**, (2022).
- 722 45. Chan, J. F. W. *et al.* Simulation of the Clinical and Pathological Manifestations of  
723 Coronavirus Disease 2019 (COVID-19) in a Golden Syrian Hamster Model:  
724 Implications for Disease Pathogenesis and Transmissibility. *Clin. Infect. Dis.* **71**,  
725 2428–2446 (2020).
- 726 46. Cao, H. *et al.* RNA binding protein 24 regulates the translation and replication of  
727 hepatitis C virus. *Protein Cell* **9**, 930–944 (2018).

- 728 47. Perlman, S. & Netland, J. Coronaviruses post-SARS: Update on replication and  
729 pathogenesis. *Nat. Rev. Microbiol.* **7**, 439–450 (2009).
- 730 48. Tostanoski, L. H. *et al.* Ad26 vaccine protects against SARS-CoV-2 severe clinical  
731 disease in hamsters. *Nat. Med.* **26**, 1694–1700 (2020).
- 732 49. Konopka, K. E. *et al.* Diffuse alveolar damage (DAD) resulting from coronavirus  
733 disease 2019 Infection is Morphologically Indistinguishable from Other Causes of  
734 DAD. *Histopathology* **77**, 570–578 (2020).
- 735 50. Veenhuis, R. T. & Zeiss, C. J. Animal Models of COVID-19 II. Comparative  
736 Immunology. *ILAR J.* **62**, 17–34 (2021).
- 737 51. Gruber, A. D., Firsching, T. C., Trimpert, J. & Dietert, K. Hamster models of COVID-  
738 19 pneumonia reviewed: How human can they be? *Vet. Pathol.* **59**, 528–545 (2022).
- 739 52. Yen, H.-L. *et al.* Transmission of SARS-CoV-2 (variant Delta) from pet hamsters to  
740 humans and onward human propagation of the adapted strain: a case study.
- 741 53. Dhakal, S. *et al.* Sex Differences in Lung Imaging and SARS-CoV-2 Antibody  
742 Responses in a COVID-19 Golden Syrian Hamster Model. *MBio* **12**, e0097421 (2021).
- 743 54. Tizard, I. Sickness behavior, its mechanisms and significance. *Anim. Health Res. Rev.*  
744 **9**, 87–99 (2008).
- 745 55. Del Valle, D. M. *et al.* An inflammatory cytokine signature predicts COVID-19  
746 severity and survival. *Nat. Med.* **26**, 1636–1643 (2020).
- 747 56. Daamen, A. R. *et al.* Comprehensive transcriptomic analysis of COVID-19 blood,  
748 lung, and airway. *Sci. Rep.* **11**, 1–19 (2021).
- 749 57. Liu, J. *et al.* SARS-CoV-2 cell tropism and multiorgan infection. *Cell Discov.* **7**, 2–5  
750 (2021).
- 751 58. Deshmukh, V., Motwani, R., Kumar, A., Kumari, C. & Raza, K. Histopathological  
752 observations in COVID-19: A systematic review. *J. Clin. Pathol.* **74**, 76–83 (2021).
- 753 59. Murira, A. & Lamarre, A. Type-I interferon responses: From friend to foe in the battle  
754 against chronic viral infection. *Front. Immunol.* **7**, 1–8 (2016).
- 755 60. García-Sastre, A. Ten Strategies of Interferon Evasion by Viruses. *Cell Host Microbe*  
756 **22**, 176–184 (2017).
- 757 61. Blanco-Melo, D. *et al.* Imbalanced host response to SARS-CoV-2 drives development  
758 of COVID-19. *Cell* 1–10 (2020) doi:10.1016/j.cell.2020.04.026.
- 759 62. Kinoshita, T. *et al.* Co-infection of SARS-CoV-2 and influenza virus causes more  
760 severe and prolonged pneumonia in hamsters. *Sci. Rep.* **11**, 1–11 (2021).
- 761 63. Yang, S. J. *et al.* Characterization of virus replication, pathogenesis, and cytokine  
762 responses in syrian hamsters inoculated with sars-cov-2. *J. Inflamm. Res.* **14**, 3781–  
763 3795 (2021).

- 764 64. Coomes, E. A. & Haghbayan, H. Interleukin-6 in Covid-19: A systematic review and  
765 meta-analysis. *Rev. Med. Virol.* **30**, 1–9 (2020).
- 766 65. Lamers, M. M. *et al.* SARS-CoV-2 productively infects human gut enterocytes.  
767 *Science (80-. )*. **369**, 50–54 (2020).
- 768 66. Qi, S. *et al.* Sex differences in the immune response to acute COVID-19 respiratory  
769 tract infection. *Biol. Sex Differ.* **12**, 1–10 (2021).
- 770 67. Jin, J. M. *et al.* Gender Differences in Patients With COVID-19: Focus on Severity and  
771 Mortality. *Front. Public Heal.* **8**, 1–6 (2020).
- 772 68. Peckham, H. *et al.* Male sex identified by global COVID-19 meta-analysis as a risk  
773 factor for death and ITU admission. *Nat. Commun.* **11**, 1–10 (2020).
- 774 69. Su, Y. J., Kuo, K. C., Wang, T. W. & Chang, C. W. Gender-based differences in  
775 COVID-19. *New Microbes New Infect.* **42**, 1–6 (2021).
- 776 70. Griffin, B. D. *et al.* Host parameters and mode of infection influence outcome in  
777 SARS-CoV-2-infected hamsters. *iScience* **24**, 103530 (2021).
- 778 71. Yuan, L. *et al.* Gender associates with both susceptibility to infection and pathogenesis  
779 of SARS-CoV-2 in Syrian hamster. *Signal Transduct. Target. Ther.* **6**, (2021).
- 780 72. Yang, L. *et al.* The signal pathways and treatment of cytokine storm in COVID-19.  
781 *Signal Transduct. Target. Ther.* **6**, 1–20 (2021).
- 782 73. Lee, S. K. Sex as an important biological variable in biomedical research. *BMB Rep.*  
783 **51**, 167–173 (2018).
- 784 74. Giobbe, G. G. *et al.* SARS-CoV-2 infection and replication in human gastric  
785 organoids. *Nat. Commun.* **12**, 1–14 (2021).
- 786 75. Rodrigues, M. V., De Castro, S. O., De Albuquerque, C. Z., De Moura Mattaraia, V.  
787 G. & Santoro, M. L. The gingival vein as a minimally traumatic site for multiple blood  
788 sampling in Guinea pigs & hamsters. *PLoS One* **12**, 1–16 (2017).
- 789 76. Leonova, K. *et al.* TRAIN (Transcription of repeats activates interferon) in response to  
790 chromatin destabilization induced by small molecules in mammalian cells. *Elife* **7**, 1–  
791 26 (2018).
- 792 77. Corman, V. *et al.* Detection of 2019 -nCoV by RT-PCR. *Euro Surveill* **25**, 1–8 (2020).
- 793 78. Gigante, C. M. *et al.* Multi-site evaluation of the LN34 pan-lyssavirus real-time RT-  
794 PCR assay for postmortem rabies diagnostics. *PLoS One* **13**, 1–25 (2018).
- 795 79. Harris, R. A. *et al.* Construction of a new chromosome-scale, long-read reference  
796 genome assembly of the Syrian hamster, *Mesocricetus auratus*. *bioRxiv* (2021).
- 797 80. Dobin, A. *et al.* STAR: Ultrafast universal RNA-seq aligner. *Bioinformatics* **29**, 15–21  
798 (2013).



- 799 81. Anders, S., Pyl, P. T. & Huber, W. HTSeq-A Python framework to work with high-  
800 throughput sequencing data. *Bioinformatics* **31**, 166–169 (2015).
- 801 82. Love, M. I., Huber, W. & Anders, S. Moderated estimation of fold change and  
802 dispersion for RNA-seq data with DESeq2. *Genome Biol.* **15**, 1–21 (2014).
- 803 83. Conesa, A. & Götz, S. Blast2GO: A comprehensive suite for functional analysis in  
804 plant genomics. *Int. J. Plant Genomics* **2008**, (2008).
- 805 84. Emms, D. M. & Kelly, S. OrthoFinder: Phylogenetic orthology inference for  
806 comparative genomics. *Genome Biol.* **20**, 1–14 (2019).
- 807 85. Pagliari, M., Bonfante, F. & Padoan, A. Omicron neutralization and the inference of  
808 correlates of protection based on anti-SARS-CoV-2 S-RBD IgG levels in boosted  
809 individuals. (2022).
- 810 86. Padoan, A. *et al.* Analytical and clinical performances of a SARS-CoV-2 S-RBD IgG  
811 assay: Comparison with neutralization titers. *Clin. Chem. Lab. Med.* **59**, 1444–1452  
812 (2021).
- 813 87. Cibir, V. *et al.* Usefulness of *Escherichia coli* and *Enterobacteriaceae* as Process  
814 Hygiene Criteria in poultry: experimental study. *EFSA Support. Publ.* **11**, (2017).
- 815 88. Roccato, A. *et al.* Usefulness of indicator bacteria as potential marker of  
816 *Campylobacter* contamination in broiler carcasses. *Int. J. Food Microbiol.* **276**, 63–70  
817 (2018).
- 818 89. Petrin, S. *et al.* Effect of pH and Salinity on the Ability of *Salmonella* Serotypes to  
819 Form Biofilm. *Front. Microbiol.* **13**, (2022).  
820

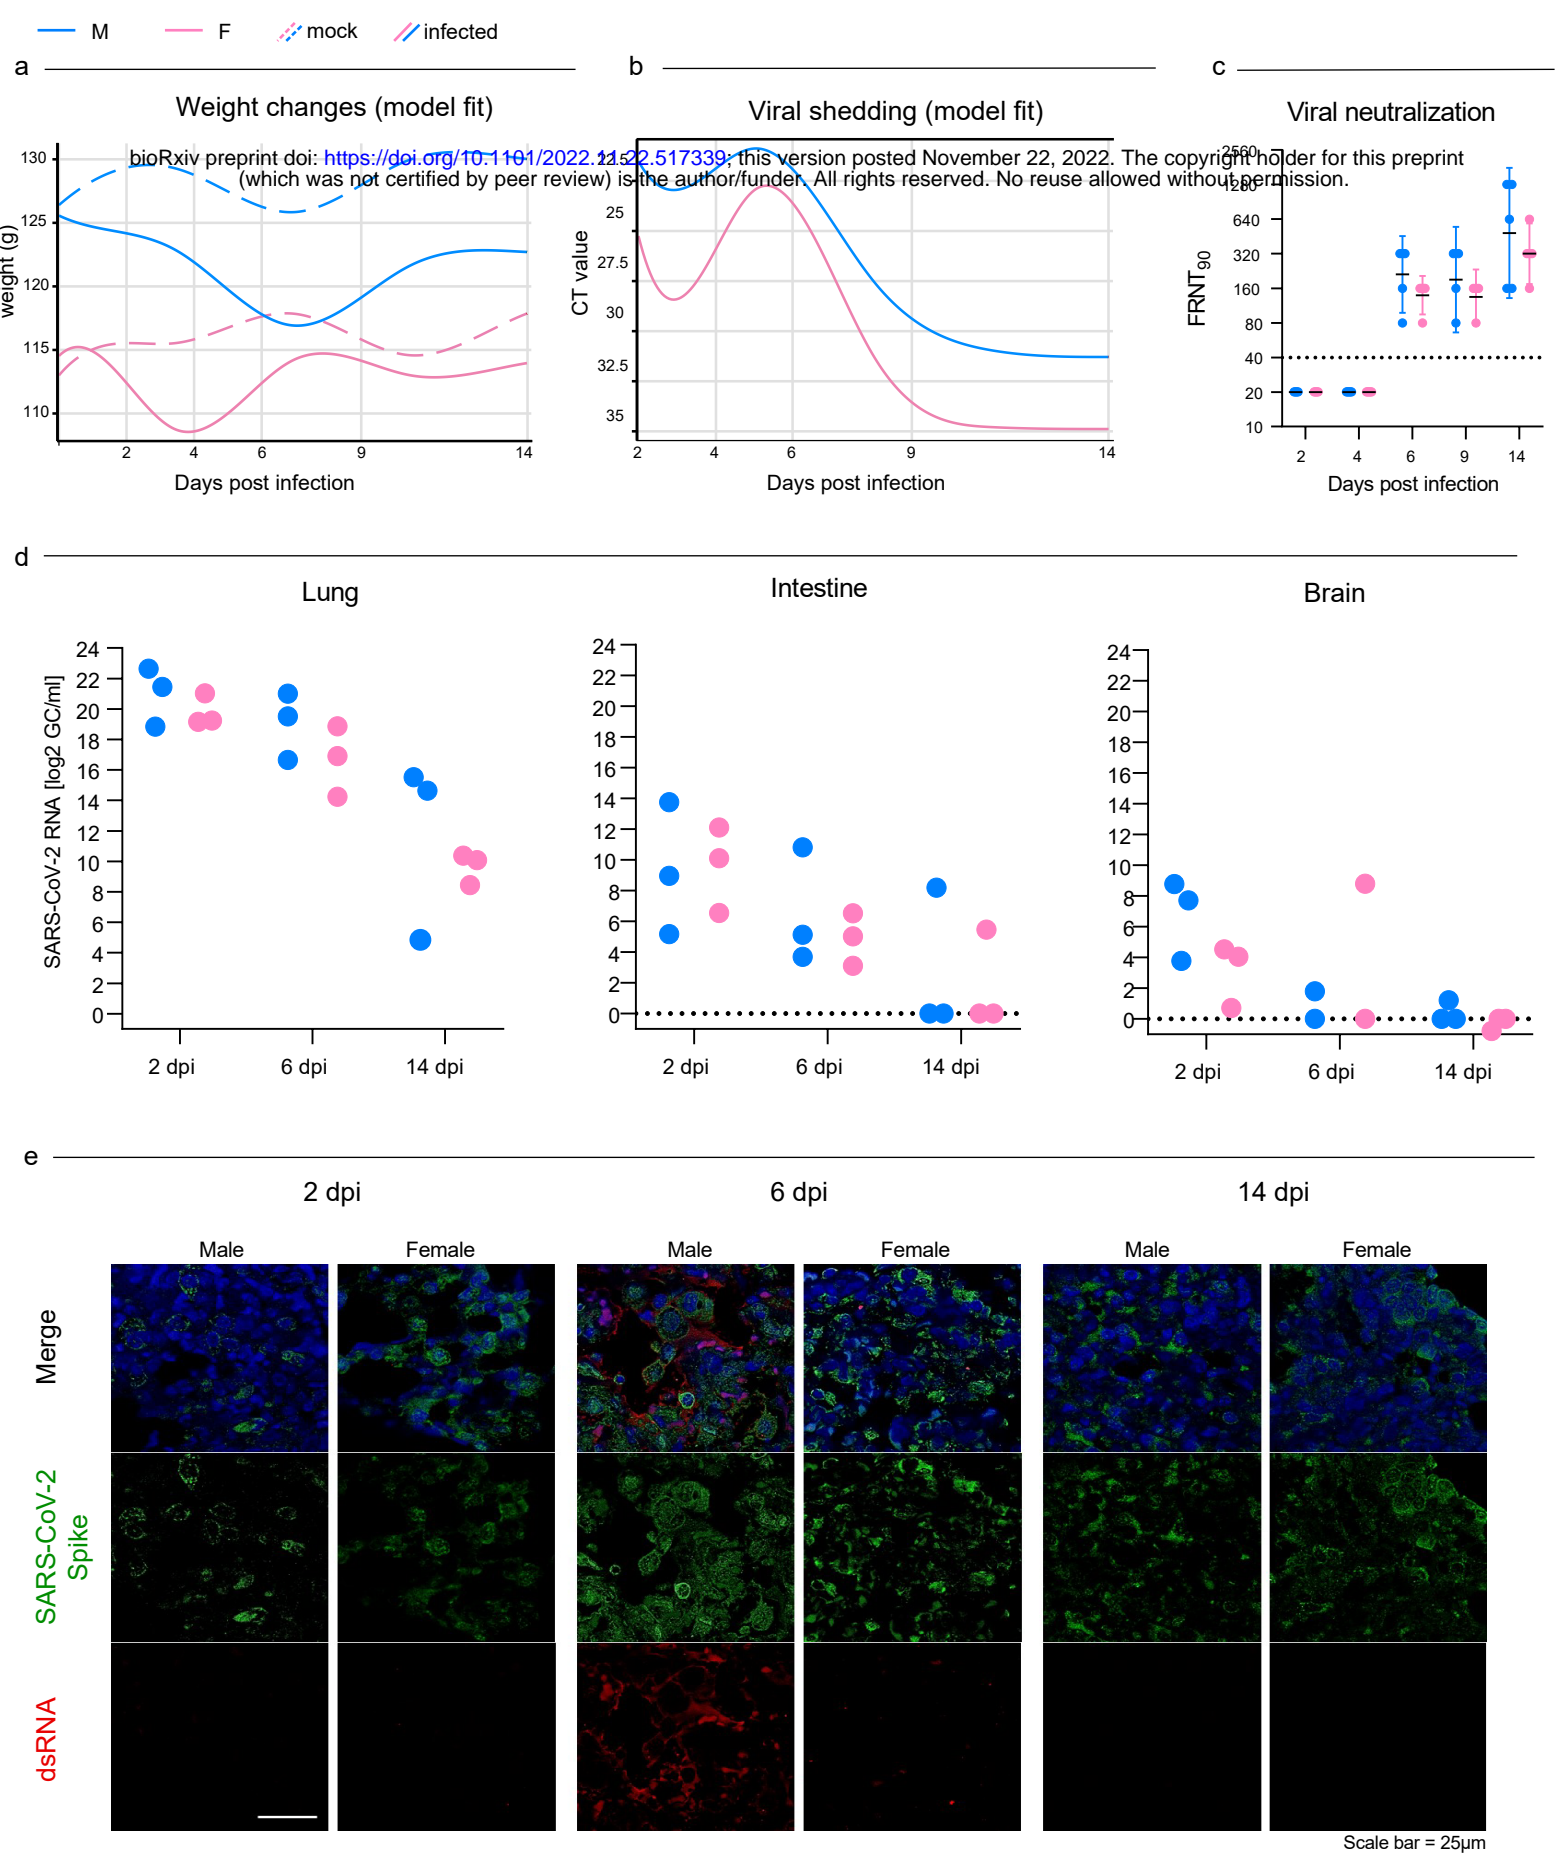

Figure 1

Mock

Male

Female

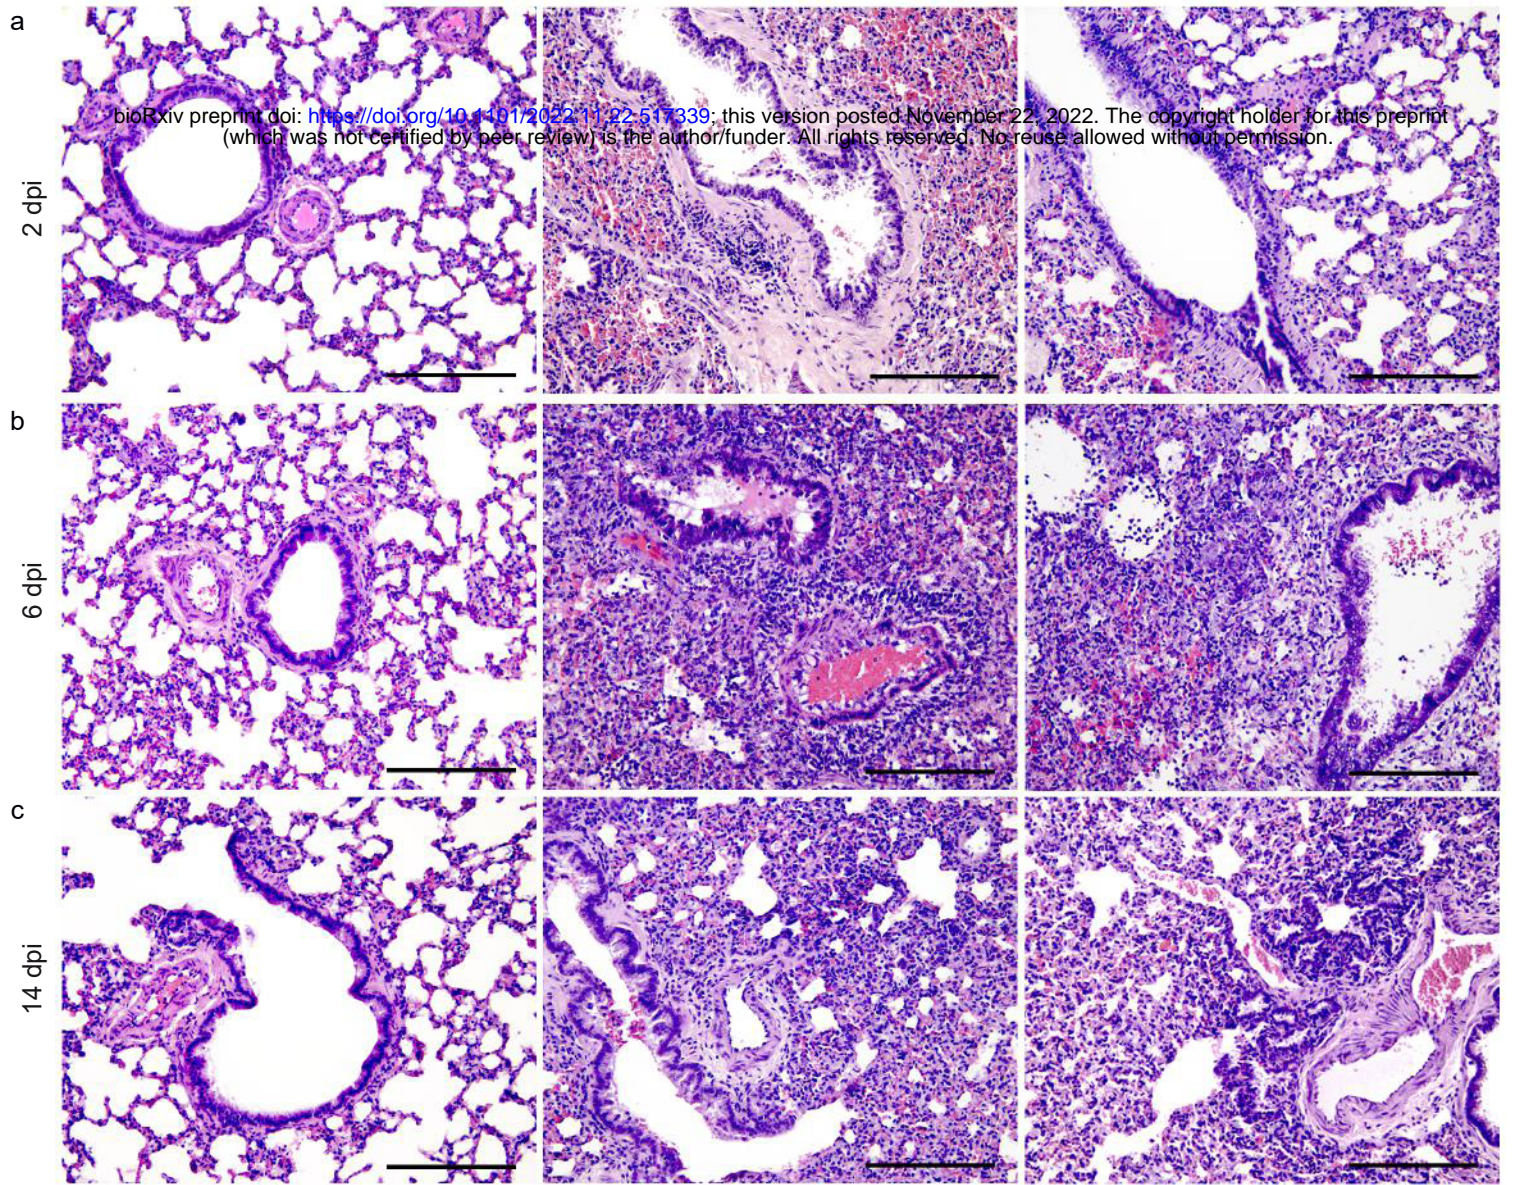

Scale bar = 200 μm

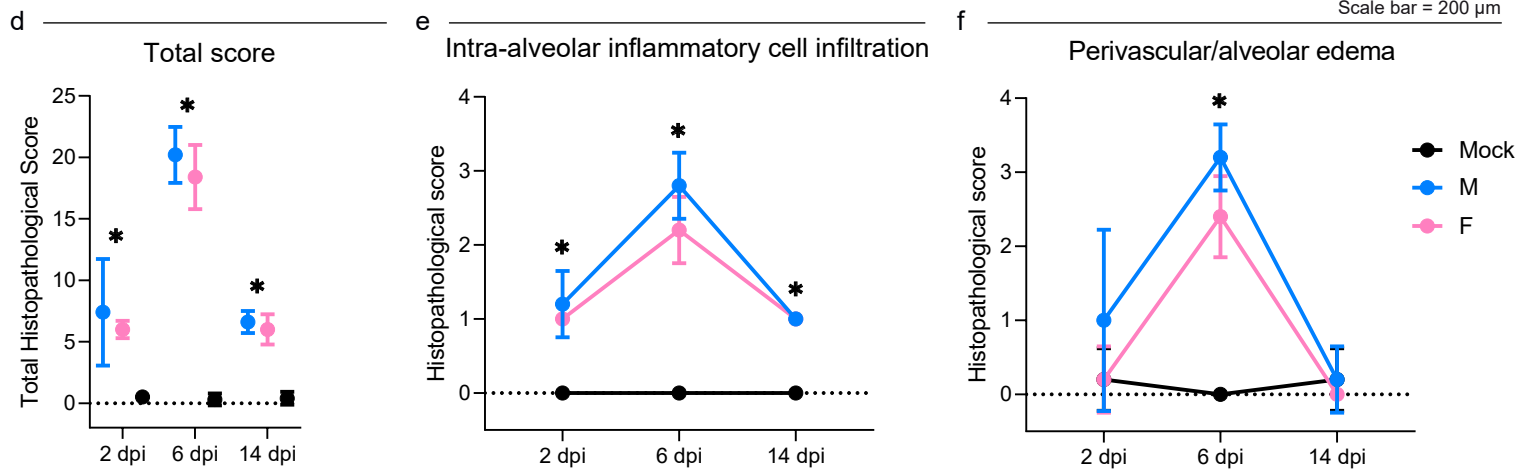

g

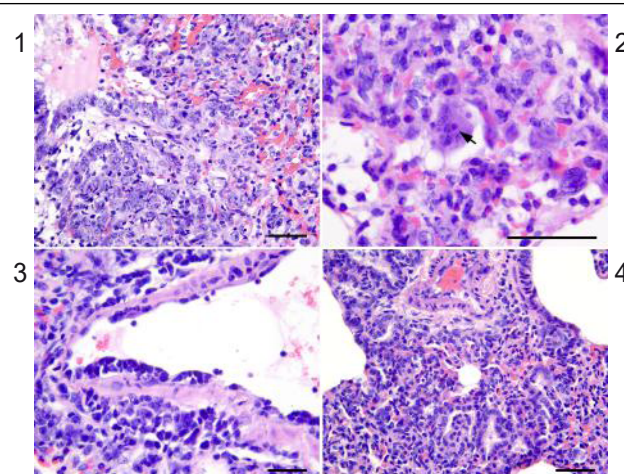

Scale bar = 50 μm

Figure 2

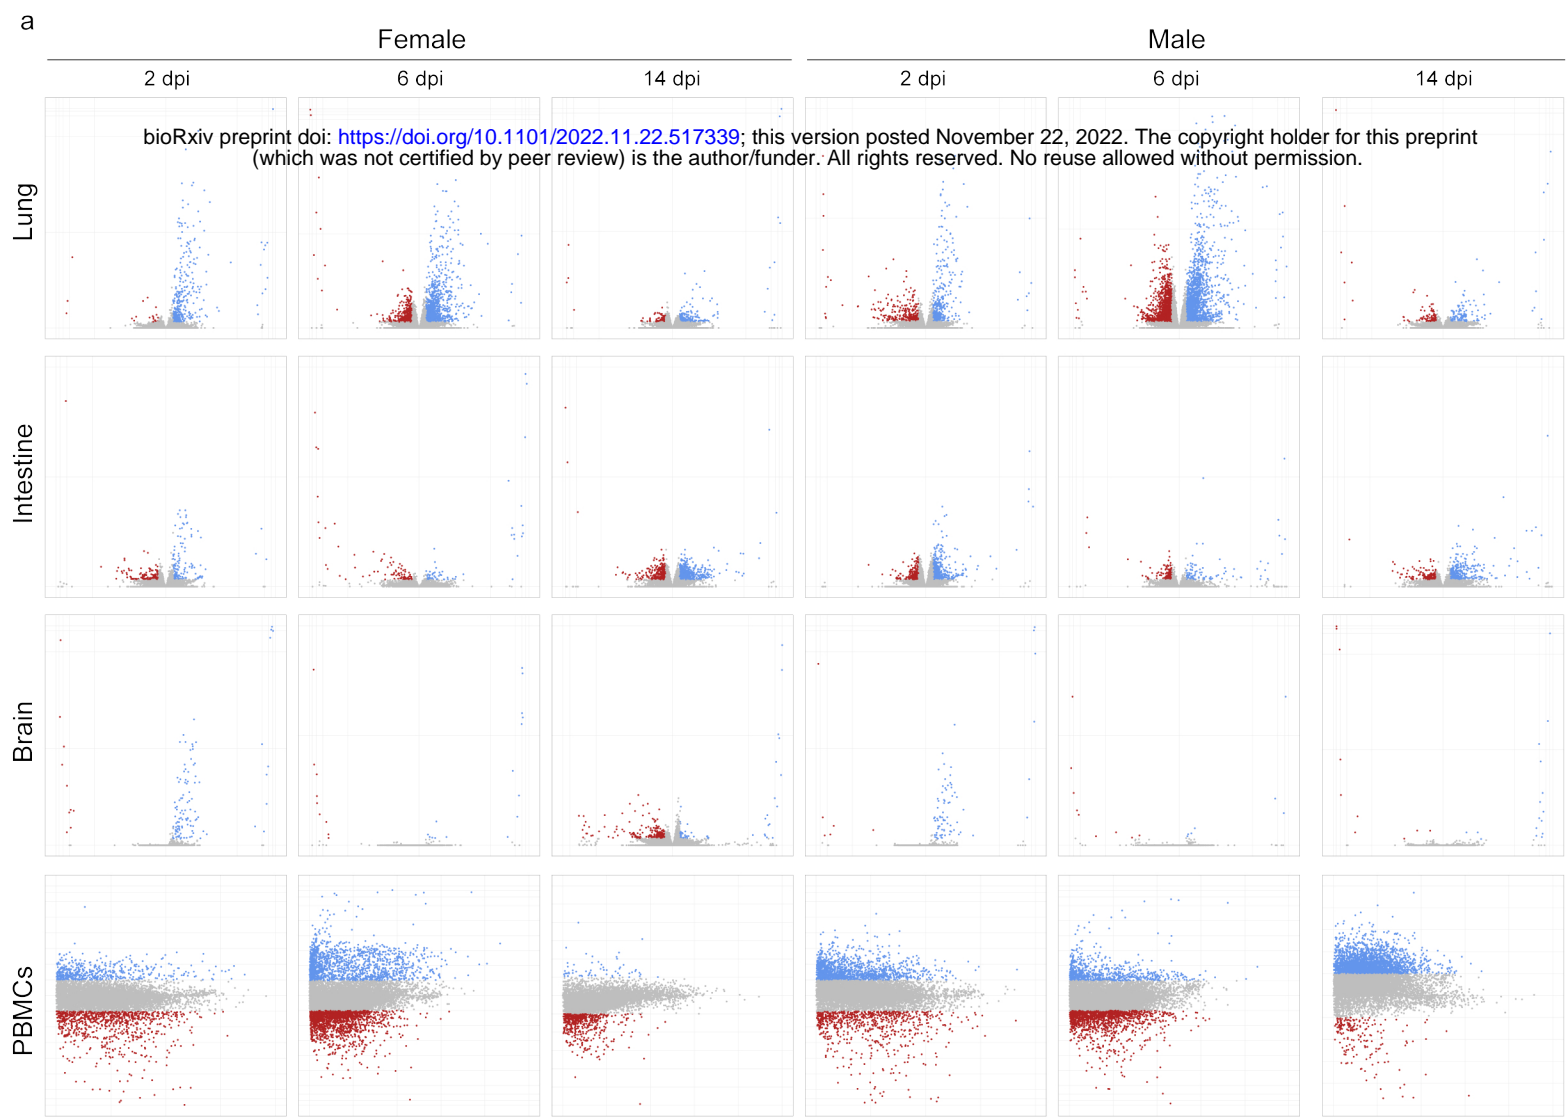

**b**

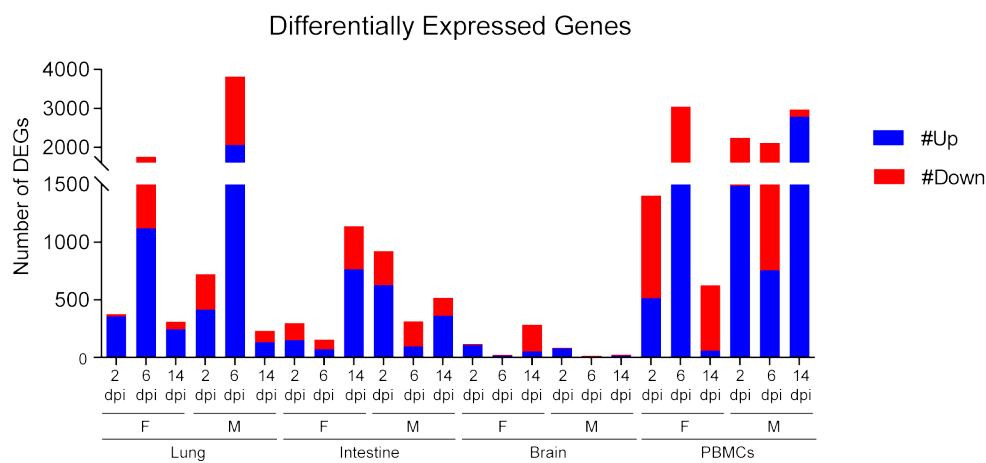

**c**

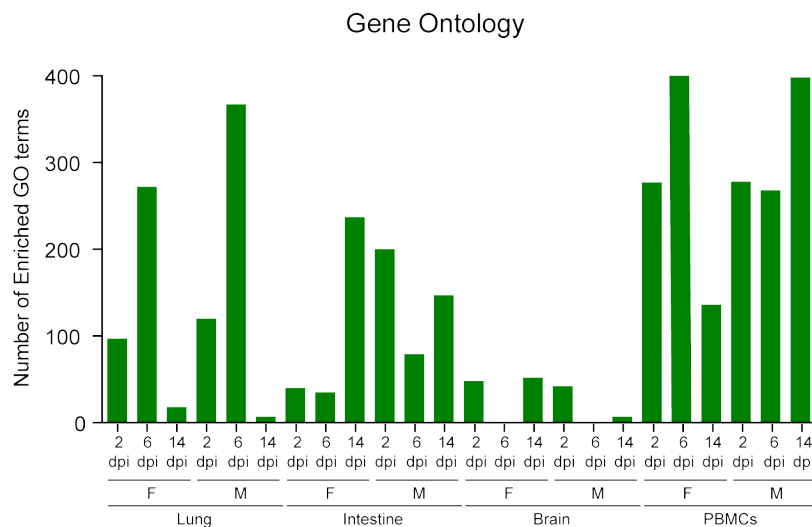

**Figure 3**

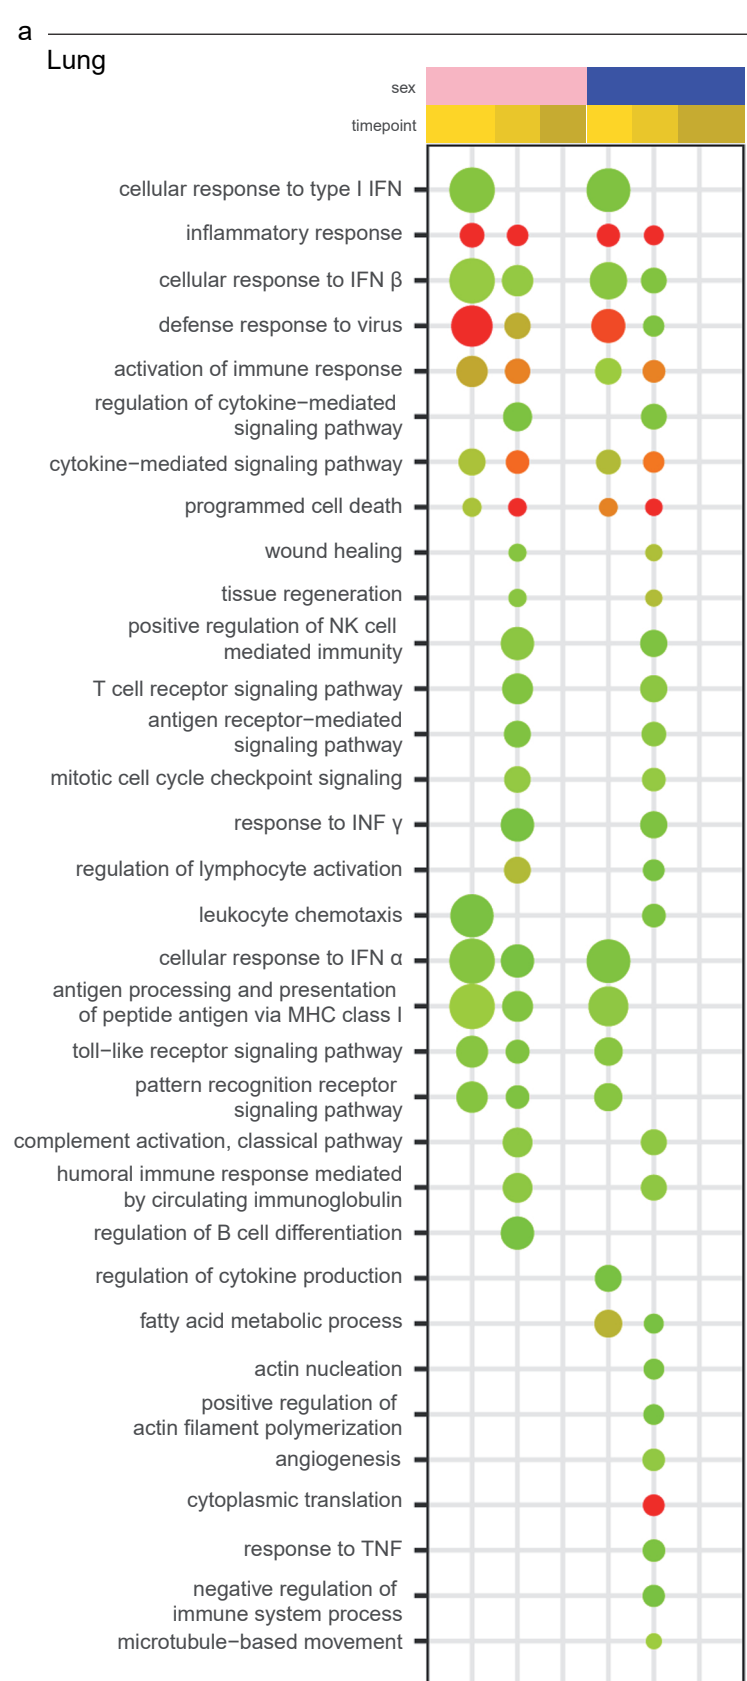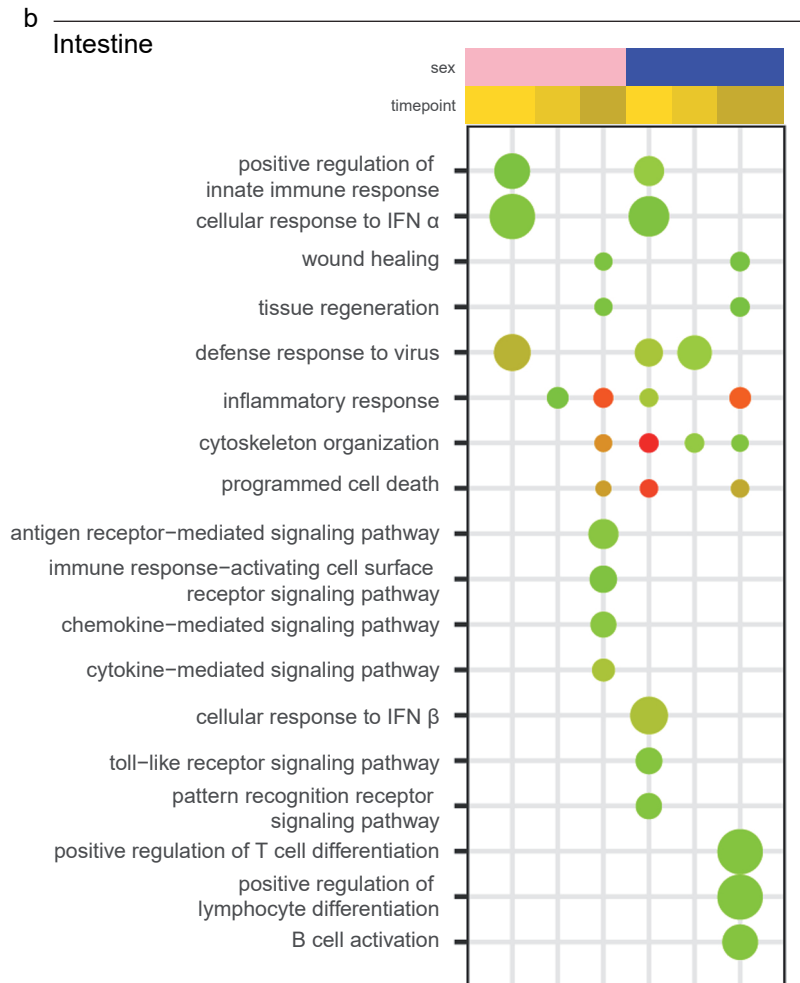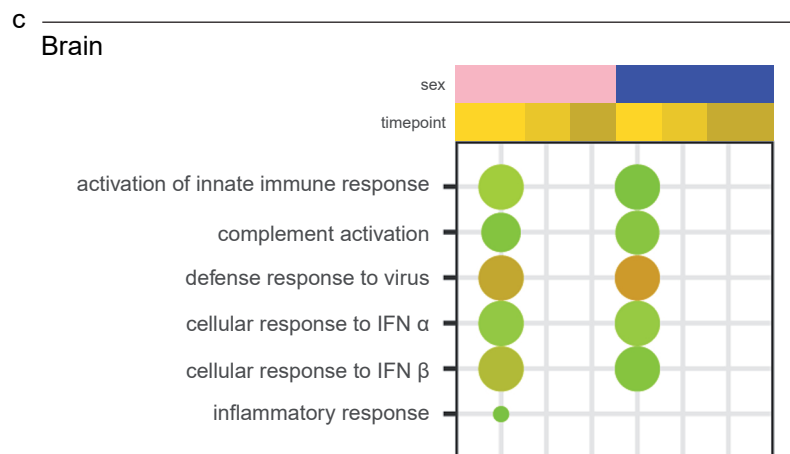

**Figure 4**

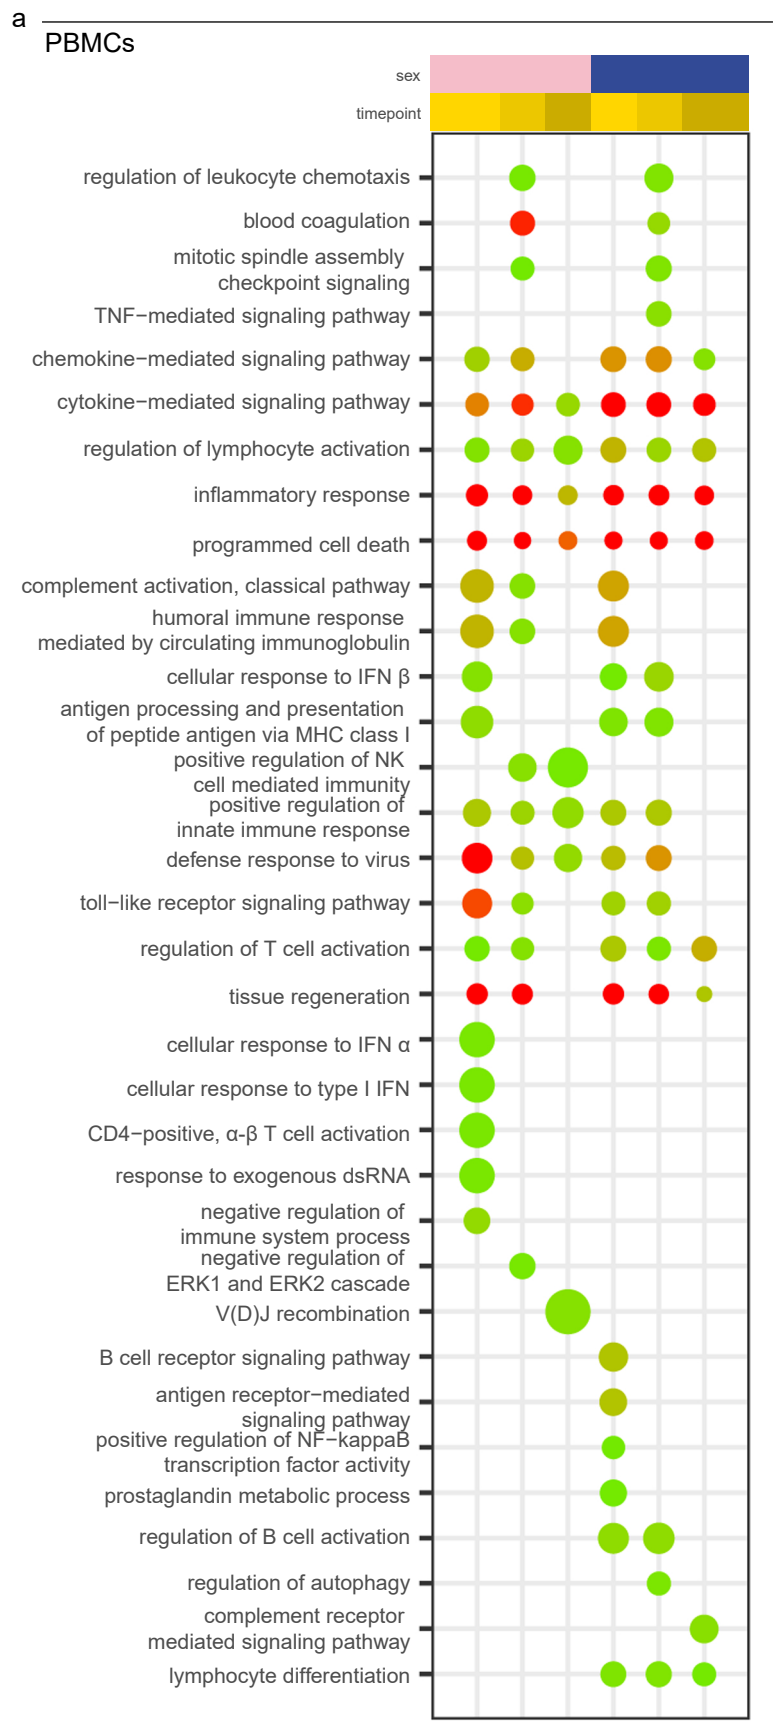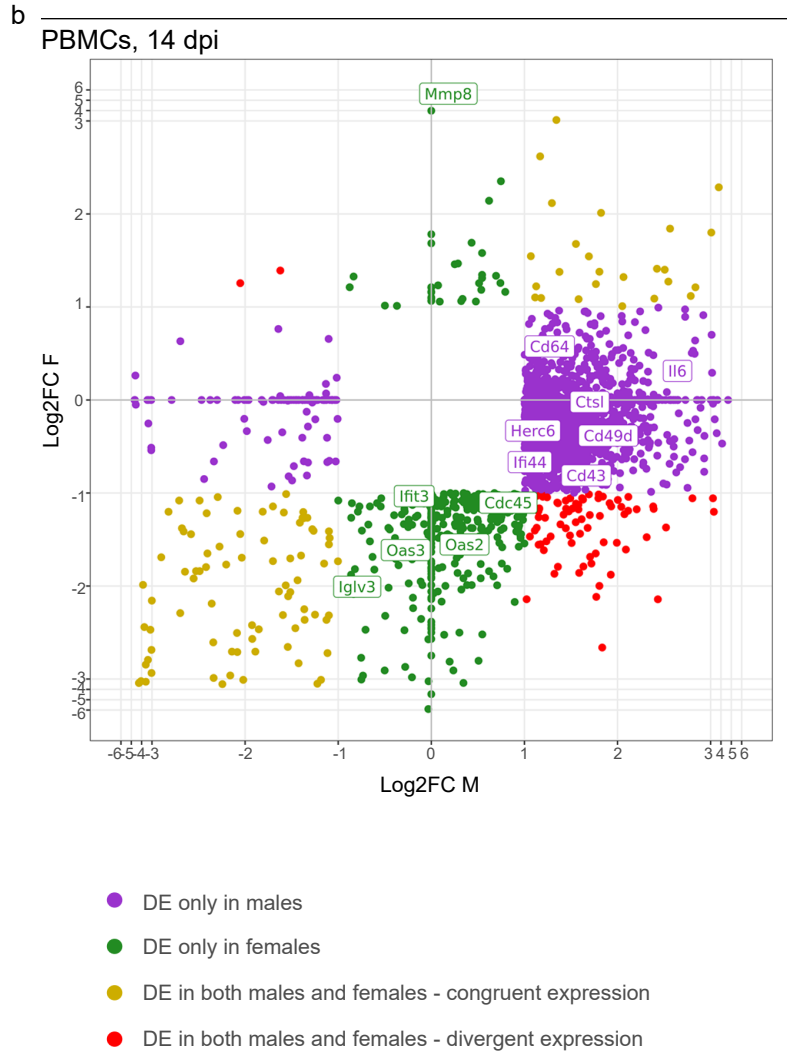

**Figure 5**

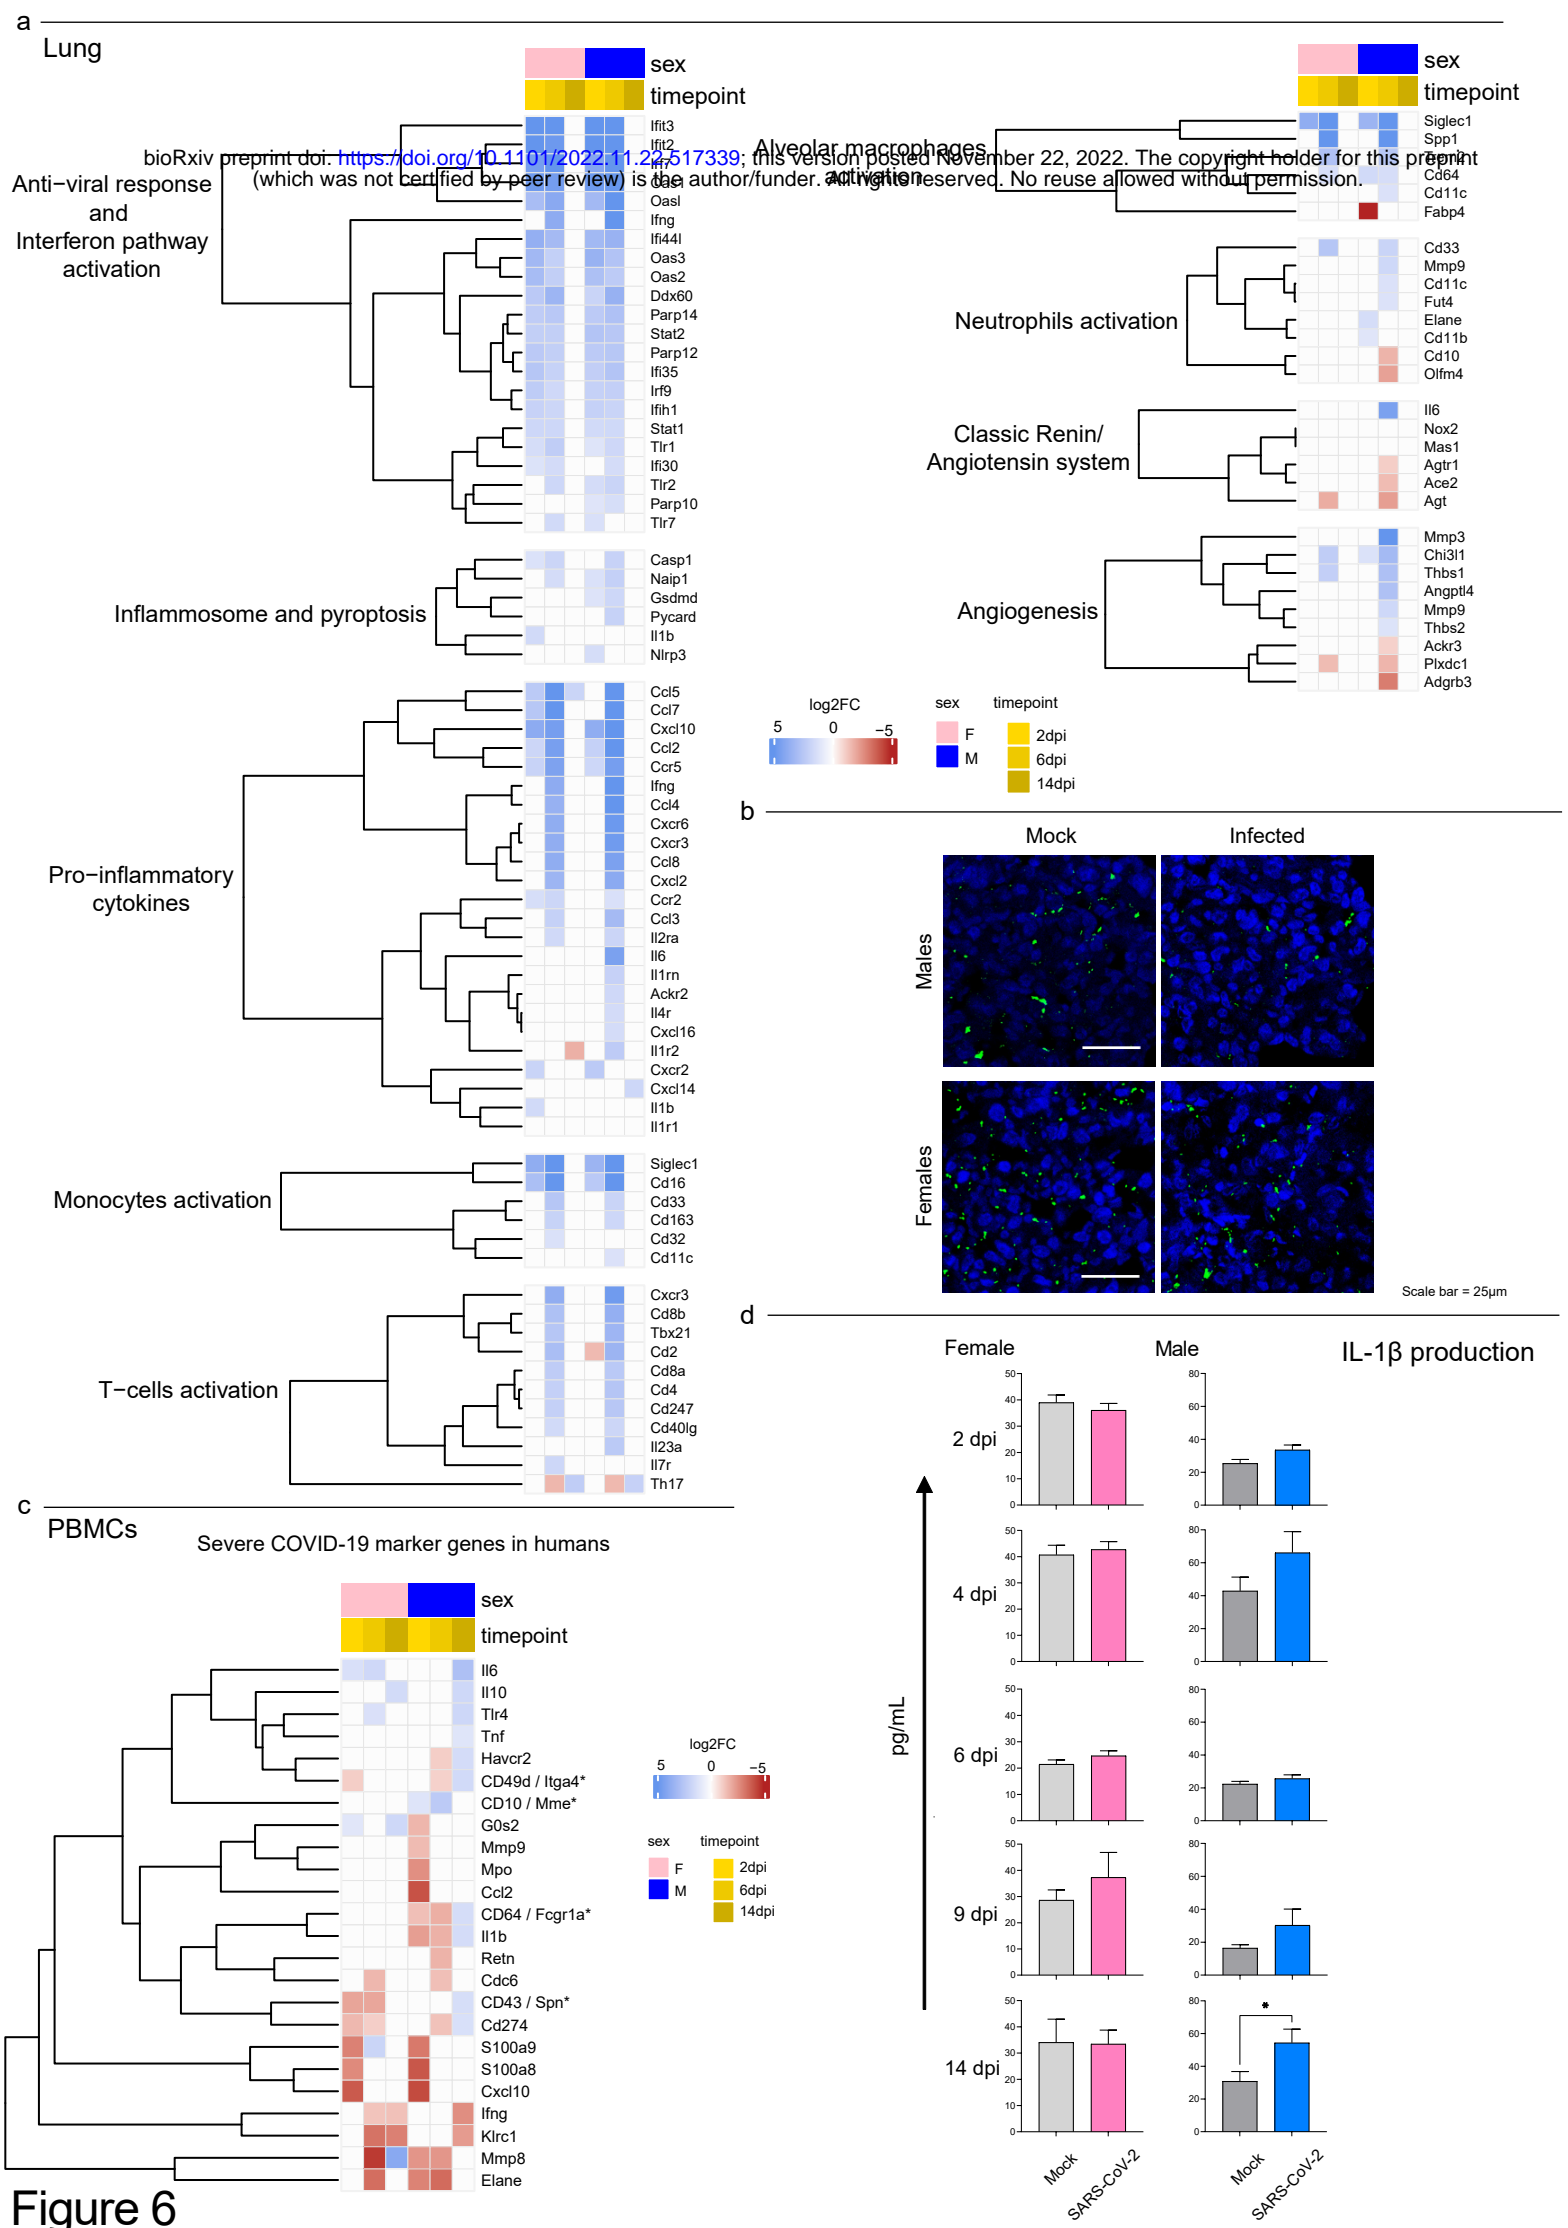

**Figure 6**
