# Supplementary material for: Host response of Syrian hamster to SARS-CoV-2 infection, including differences with humans and between sexes
Source: bioRxiv or medRxiv preprint supplement (doi:10.1101/2022.11.22.517339), 2023-01-19
Supplement: Supplementary file [file media-3.pdf]

a

Merge

SARS-CoV-2 Spike

dsRNA

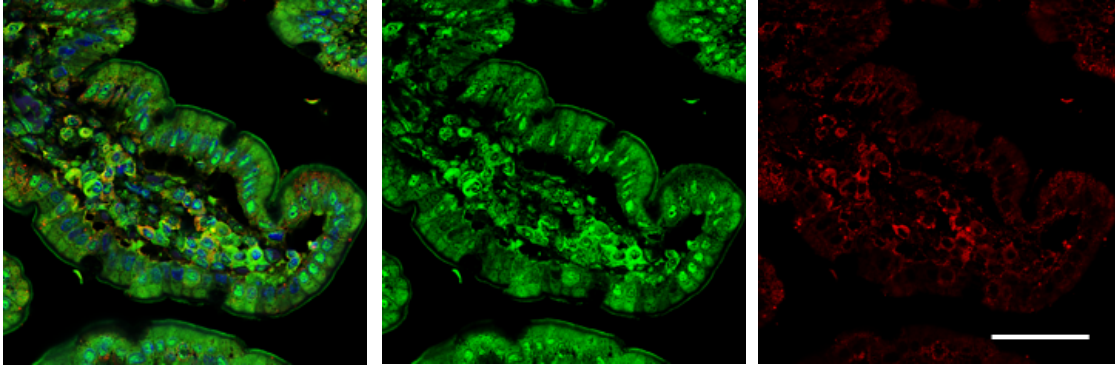

Scale bar = 50 $\mu$ m

b

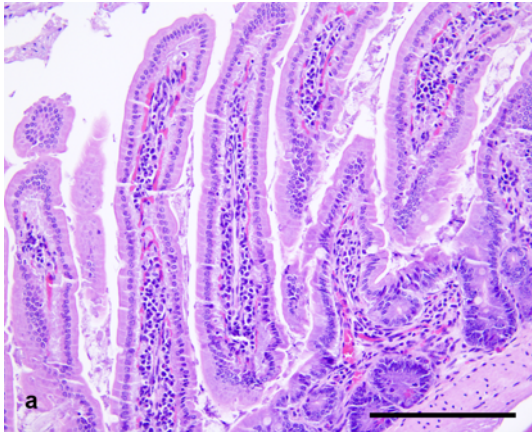

c

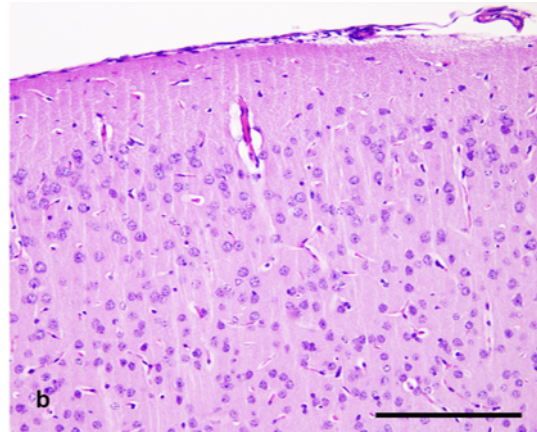

Scale bar = 200 $\mu$ m
