# Supplementary material for: Host response of Syrian hamster to SARS-CoV-2 infection, including differences with humans and between sexes
Source: bioRxiv or medRxiv preprint supplement (doi:10.1101/2022.11.22.517339), 2023-01-19

a

### IL-6 production

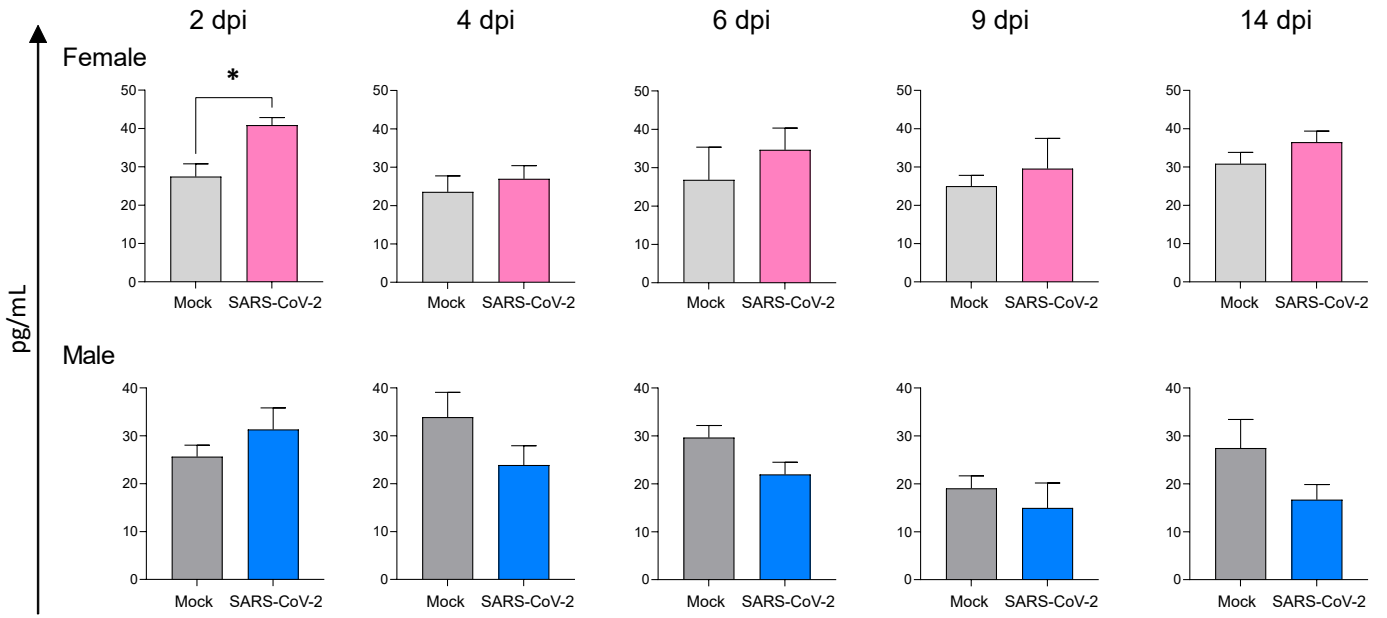

Supplement: Supplementary file [file media-4.pdf]
