# Supplementary material for: Host response of Syrian hamster to SARS-CoV-2 infection, including differences with humans and between sexes
Source: bioRxiv or medRxiv preprint supplement (doi:10.1101/2022.11.22.517339), 2023-01-19
Supplement: Supplementary file [file media-5.pdf]

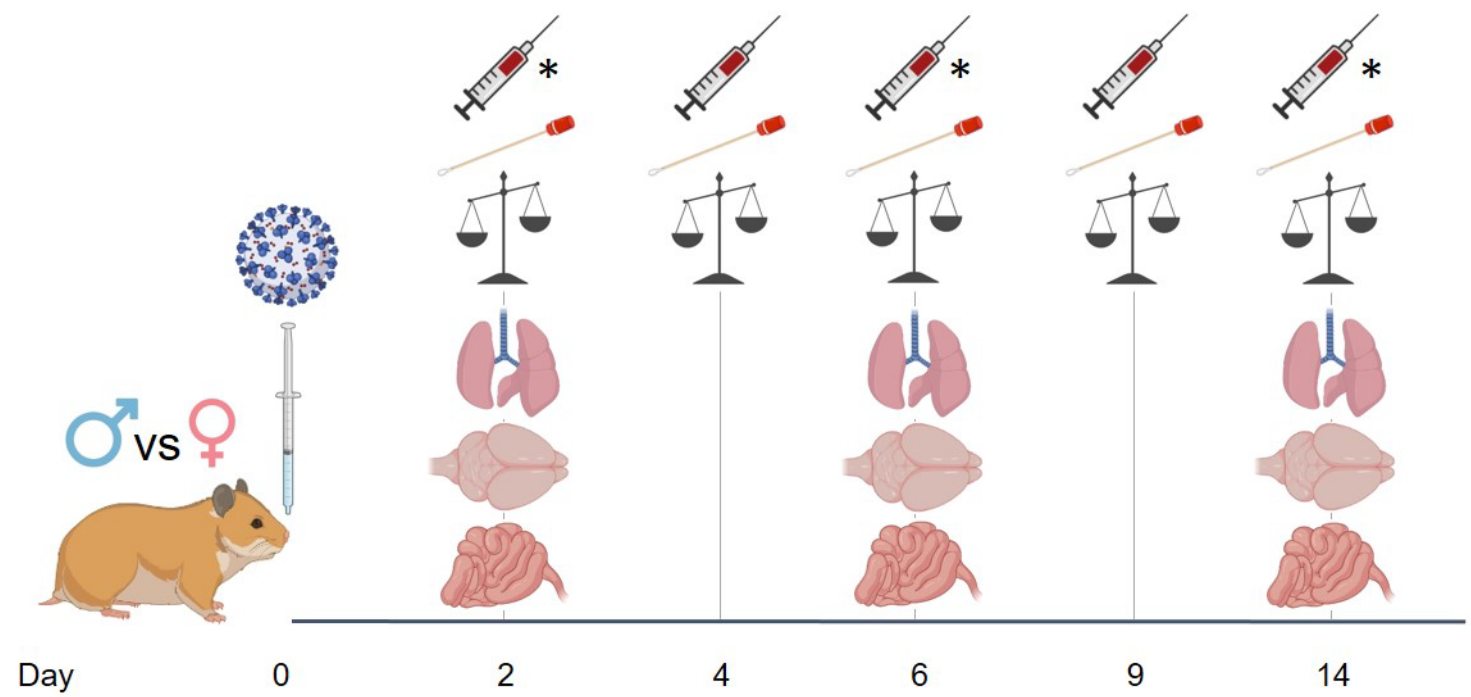

-7 days acclimation

 Blood collection

 Oropharyngeal swabs

 Weight monitoring

 Organ harvesting

\* Terminal blood collection and PBMCs isolation

Supplementary Figure 3
